# Supplementary material for: Effect of HSV-2 infection on subsequent HIV acquisition: an updated systematic review and meta-analysis
Source: PubMed Central journal article supplement — Lancet Infect Dis. 2017 Dec;17(12):1303–16. doi: 10.1016/S1473-3099(17)30405-X (PMC5700807; doi:10.1016/s1473-3099(17)30405-x), 2017-12
Supplement: mmc1.pdf [file mmc1.pdf]

# THE LANCET Infectious Diseases

## Supplementary webappendix

This webappendix formed part of the original submission and has been peer reviewed. We post it as supplied by the authors.

Supplement to: Looker KJ, Elmes JAR, Gottlieb SL, et al. Effect of HSV-2 infection on subsequent HIV acquisition: an updated systematic review and meta-analysis. *Lancet Infect Dis* 2017; published online August 23. [http://dx.doi.org/10.1016/S1473-3099\(17\)30405-X](http://dx.doi.org/10.1016/S1473-3099(17)30405-X).

## Appendix

### The effect of HSV-2 infection on subsequent HIV acquisition: an updated systematic review and meta-analysis

Looker, K. J., Elmes, J. A. R., Gottlieb, S. L., Schiffer, J. T., Vickerman, P., Turner, K. M. E. and Boily, M.-C.

#### FURTHER DETAILS ON THE METHODS

##### A. Search strategy and selection criteria

Two reviewers (KJL and JARE) performed the searches, screened the articles and extracted the data in an electronic spreadsheet. PubMed/Medline and Embase online bibliographic databases were searched from 01/01/2003 to 25/05/2017 to ensure overlap with the review by Freeman *et al.*(1) which had date of search to June 2004. This simultaneously enabled us to ensure our searches were sufficiently sensitive, i.e., retrieved those publications from 2003 and 2004 found by Freeman *et al.*(1) – about half of their included studies. To this dataset we also added articles published before 2003 taken directly from Freeman *et al.*

For PubMed, we combined 2 searches: (1) article titles and abstracts were searched using the following keywords: (HIV\*, human immunodeficiency virus, human immunodeficiency virus, human immune deficiency virus OR human immuno deficiency virus) AND (HSV\*, herpes simplex, herpes virus type 2, herpes virus 2, herpesvirus 2, genital herpes OR herpes genitalis); (2) articles were searched using the following MeSH Terms: (herpes simplex OR simplexvirus) AND (human immunodeficiency virus, HIV infection, HIV antibodies, HIV seronegativity OR HIV seroprevalence). No terms were included for study design; longitudinal study design was identified at the screening stages.

For Embase, the search strategy was as follows: HIV\*.ti,ab, human immun#deficiency virus.ti,ab, human immun# deficiency virus.ti,ab (all keywords), exp[loded] human immunodeficiency virus, exp human immunodeficiency virus infection, exp human immunodeficiency virus antibody, human immunodeficiency virus prevalence OR exp HIV test (all mapped terms), AND: HSV\*.ti,ab, herpes simplex.ti,ab, herpes virus type 2.ti,ab, herpes virus 2.ti,ab, herpesvirus 2.ti,ab, genital herpes.ti,ab, herpes genitalis.ti,ab (all keywords), simplexvirus, exp[loded] herpes simplex virus 2 OR exp herpes simplex (all mapped terms), AND: inciden\*.ti,ab, longitudinal\*.ti,ab, prospective\*.ti,ab, cohort\*.ti,ab, follow up.ti,ab, follow\*up.ti,ab, follow\* up.ti,ab, case-control.ti,ab, trial.ti,ab, time series\*.ti,ab, intent\* to treat.ti,ab, clinical trial.ti,ab, seroinciden\*.ti,ab, seroconvert\*.ti,ab, control group\*.ti,ab, time to event\*.ti,ab, RCT\*.ti,ab, hazard\*.ti,ab, retrospective\*.ti,ab (all keywords), exp[loded] incidence, exp disease course, exp longitudinal study, exp time, exp prospective study, exp cohort analysis, exp survival, exp follow up, exp case control study, exp retrospective study, exp control group, exp attributable risk, exp risk factor, exp infection risk, exp infection rate, exp virus transmission, exp clinical trial (topic) OR exp randomized controlled trial (topic) (all mapped terms).

Searches were not restricted by language or bibliographic database filters. We excluded cross-sectional studies, studies with no primary data or report of the association between HSV-2 and HIV, studies not diagnosing HSV-2 infection with a type-specific antibody assay, studies relying on self-

reported HIV status, and studies limited to HSV-2-infected and/or HIV-infected individuals only (i.e., no uninfected participants were included). We did not exclude studies on the basis of study quality, which was assessed in detail. Reference lists of retrieved full-text articles and other reviews were also checked to identify additional potential publications(2).

## B. Data extraction

Crude cRR and adjusted aRR (and 95%CI) based on hazard or incidence rate ratios (HR and IRR respectively), or odds ratios (OR), were extracted, or derived from available data. We used the following formulae for calculating cRR (or their 95%CI) from given numbers in the papers where estimates were not directly reported:

$$\log IRR = \ln ((d_1/T_1)/(d_0/T_0))$$

$$se \log IRR = \sqrt{1/d_1 + 1/d_0}$$

$$\log OR = \ln ((d_1/(N_1-d_1))/(d_0/(N_0-d_0)))$$

$$se \log OR = \sqrt{1/d_1 + 1/d_0 + 1/(N_1-d_1) + 1/(N_0-d_0)}$$

where  $d_0$  and  $d_1$  are the number of unexposed and exposed cases, respectively,  $N_0$  and  $N_1$  are the number in the unexposed and exposed population, respectively, and  $T_0$  and  $T_1$  are the total person-years at risk for the unexposed and exposed population, respectively.

For the subsequent meta-analysis, standard errors were calculated from:

$$se \log \theta = (\ln(95\%UCB) - \ln(95\%LCB))/3.92$$

where  $\theta$  is either HRR, IRR or OR, UCB is the upper confidence bound and LCB is the lower confidence bound.

Studies reporting only the significance/non-significance of an association without an estimate, or which could have estimated an association but did not report the results were included. Where multiple publications reported on the same study population, we preferably extracted estimates based on HR from cox regression model or IRR and then on the largest sample size.

We extracted available RR stratified by age, sex, study year, and study arm (for controlled trials). In addition, we extracted information on several participant characteristics (e.g., age, sex, population, and WHO region, the latter subsequently used to define world region) and study characteristics (e.g., study years, study design, sample size, length and rate of follow-up, frequency of sampling, HSV-2 exposure, unexposed comparison group definition, and key potential confounders adjusted for: male circumcision status, condom use, female hormonal contraception use, sexual behaviour (any related variable except condom use), genital ulcer disease (GUD), number of sexual partners and age). We noted if estimates were inappropriately adjusted for GUD, because GUD, which is often caused by HSV-2, is likely to be on the causal pathway to HIV since ulcers can act as a portal of entry for HIV(3, 4). Follow-up rate was defined as the fraction of individuals eligible for inclusion in the study with at least one follow-up visit for HIV. Thus, follow-up rate was a function of (a) the proportion of eligible individuals recruited; (b) the proportion of recruited individuals with subsequent follow-up; and (c) the proportion of followed-up individuals with HSV-2 and HIV testing. The number of individuals at each stage of the study was not always available; therefore we computed the follow-up rate using as

much information as was available, meaning follow-up rate was in some instances overestimated. The follow-up rate for the overarching cohort study or controlled trial was used for nested case-control studies. For those studies included in previous reviews(1, 5) we extracted estimates and information from the original publications rather than from the reviews. The exception was for information and/or estimates obtained through author contact by Freeman *et al.*(1).

RR estimates of HIV following exposure to incident HSV-2 infection were classified in five timing categories reflecting uncertainty in the time sequence between HSV-2 and HIV seroconversion as follows: first, we noted whether the estimate included (a) HSV-2 seroconversion prior to HIV seroconversion (Yes/No/Unknown); (b) HSV-2 seroconversion in the same study interval as HIV seroconversion (Yes/No/Unknown); and (c) HSV-2 seroconversion after HIV seroconversion (Yes/No/Unknown). Second, using these responses we defined: 1=HSV-2 seroconversion observed in previous time interval and thus HSV-2 infection happened before HIV (definitely before); 2=HSV-2 seroconversion observed in same time interval as HIV and thus HSV-2 infection may have happened before or after HIV (indeterminably close); 3=HSV-2 seroconversion observed in previous or in same time interval as HIV (before & indeterminably close); 4a=some HSV-2 seroconversion may have occurred after HIV (maybe after & indeterminably close/before); 4b=some HSV-2 seroconversion observed after HIV (after & indeterminably close/before).

### C. Newcastle-Ottawa Quality Assessment Scale assessment

Our criteria for awarding a star in each category of the Newcastle-Ottawa Quality Assessment Scale was as follows:

#### Case-control studies (including nested case-control studies)

| Criteria                                                                                            | Condition required to obtain a star                                                                                                                                                                                                                                                                         | Bias assessed                                                                |
|-----------------------------------------------------------------------------------------------------|-------------------------------------------------------------------------------------------------------------------------------------------------------------------------------------------------------------------------------------------------------------------------------------------------------------|------------------------------------------------------------------------------|
| <i>Selection 1) Is the Case Definition Adequate (HIV seroconversion)?</i>                           | Method for confirming HIV positives stated                                                                                                                                                                                                                                                                  | Misclassification of outcome; selection of cases affected by exposure status |
| <i>Selection 2) Representativeness of the Cases</i>                                                 | Cases were representative of general population individuals in the community (i.e., outside a core risk group), or an epidemiological core group commonly of interest (FSWs, MSM and STI clinic attendees; individuals in a serodiscordant partnership or with other higher-risk sexual behaviour excluded) | Sample representativeness                                                    |
| <i>Selection 3) Selection of Controls (HIV-negative)</i>                                            | Awarded for all studies; considered to be unlikely as a source of bias in this review (studies nested within a cohort study or controlled trial)                                                                                                                                                            | Selection of controls affected by exposure status                            |
| <i>Selection 4) Definition of Controls</i>                                                          | Awarded for all studies; considered to be unlikely as a source of bias in this review because HIV testing was a review inclusion criterion                                                                                                                                                                  | Misclassification of outcome                                                 |
| <i>Comparability 1a) Comparability of Cases and Controls on the Basis of the Design or Analysis</i> | Adjustment or matching for age was done                                                                                                                                                                                                                                                                     | Confounding                                                                  |
| <i>Comparability 1b) Comparability of Cases and Controls on the Basis of the Design or Analysis</i> | Adjustment or matching for number of sexual partners (any timeframe) was done                                                                                                                                                                                                                               | Confounding                                                                  |
| <i>Exposure 1) Ascertainment of Exposure (HSV-2 infection status)</i>                               | Unexposed group was defined as HSV-2 seronegative throughout the study (rather than just at baseline)                                                                                                                                                                                                       | Misclassification of exposure                                                |
| <i>Exposure 2) Same Method of Exposure Ascertainment for Cases and Controls</i>                     | Awarded for all studies; considered to be unlikely as a source of bias in this review (stored or earlier samples used to define exposure status)                                                                                                                                                            | Differential measurement of exposure status on basis of outcome              |

|                                      |                                          |                                                                      |
|--------------------------------------|------------------------------------------|----------------------------------------------------------------------|
| <i>Exposure 3) Non-Response Rate</i> | Follow-up/response rate was at least 80% | Participants drop out for reasons related to the exposure or outcome |
|--------------------------------------|------------------------------------------|----------------------------------------------------------------------|

### Cohort studies and controlled trials (excluding nested case-control studies)

| Criteria                                                                                     | Condition required to obtain a star                                                                                                                                                                                                                                                                                       | Bias assessed                                                        |
|----------------------------------------------------------------------------------------------|---------------------------------------------------------------------------------------------------------------------------------------------------------------------------------------------------------------------------------------------------------------------------------------------------------------------------|----------------------------------------------------------------------|
| <i>Selection 1) Representativeness of the Exposed Cohort (HSV-2 infected)</i>                | Exposed individuals were representative of general population individuals in the community (i.e., outside a core risk group), or an epidemiological core group commonly of interest (FSWs, MSM and STI clinic attendees; individuals in a serodiscordant partnership or with other higher-risk sexual behaviour excluded) | Sample representativeness                                            |
| <i>Selection 2) Selection of the Non-Exposed Cohort</i>                                      | Awarded for all studies; considered to be unlikely as a source of bias in this review (individuals not self-selected on basis of HSV-2 infection status)                                                                                                                                                                  | Differential selection on basis of exposure                          |
| <i>Selection 3) Ascertainment of Exposure</i>                                                | Unexposed group was defined as HSV-2 seronegative throughout the study (rather than just at baseline)                                                                                                                                                                                                                     | Misclassification of exposure                                        |
| <i>Selection 4) Demonstration That Outcome of Interest Was Not Present at Start of Study</i> | Awarded for all studies; considered to be unlikely as a source of bias in this review because HIV testing was a review inclusion criterion                                                                                                                                                                                | Misclassification of outcome; exposure did not precede outcome       |
| <i>Comparability 1a) Comparability of Cohorts on the Basis of the Design or Analysis</i>     | Adjustment or matching for age was done                                                                                                                                                                                                                                                                                   | Confounding                                                          |
| <i>Comparability 1a) Comparability of Cohorts on the Basis of the Design or Analysis</i>     | Adjustment or matching for number of sexual partners (any timeframe) was done                                                                                                                                                                                                                                             | Confounding                                                          |
| <i>Outcome 1) Assessment of Outcome (HIV seroconversion)</i>                                 | Method for confirming HIV positives stated                                                                                                                                                                                                                                                                                | Misclassification of outcome                                         |
| <i>Outcome 2) Was Follow-Up Long Enough for Outcomes to Occur?</i>                           | Length of follow-up was at least a year                                                                                                                                                                                                                                                                                   | Inadequate identification of outcome                                 |
| <i>Outcome 3) Adequacy of Follow-Up of Cohorts</i>                                           | Follow-up rate was at least 80%                                                                                                                                                                                                                                                                                           | Participants drop out for reasons related to the exposure or outcome |

### D. Principal meta-analysis

All estimates within each sub-category for pooling were independent (i.e., for non-overlapping study populations). In some studies, more than one estimate was shown and pooled per sub-category in the main meta-analysis, corresponding to independent estimates from more than one country or city.

### E. Assessment of heterogeneity

We investigated the impact of heterogeneity across independent RR using the  $I^2$  statistic(6), which is the percentage variation between effect sizes that is attributable to heterogeneity rather than sampling error. The following guidance for interpretation of the  $I^2$  statistic has been suggested: low:  $I^2=25-30\%$ ; moderate:  $I^2=50-75\%$ ; and high:  $I^2\geq 75\%$ (7).

Only independent aRR were included in the meta-regression; we preferentially selected aRR of the association between HIV acquisition following exposure to incident HSV-2 infection over exposure to prevalent HSV-2 infection, where both were available from a study.

The meta-regression did not show the absolute effect of a factor in the association between HSV-2 infection and HIV acquisition. Therefore, sub-group analyses of aRR were conducted separately for the incident and prevalent HSV-2 exposures to produce pooled estimates of the association between HSV-2 infection and HIV acquisition. This was done for factors deemed epidemiologically important *a*

*priori* (i.e., female sex workers (FSWs), men who have sex with men (MSM), risk group, age, sex, definition of unexposed comparison group, HIV testing frequency and timing sequence for incident HSV-2 infection) and any additional statistically significant factors identified in the univariable meta-regression. The definition of unexposed comparison group and HIV testing frequency were explored because both may introduce misclassification biases and bias RR estimates toward the null. Timing sequence was explored as this may bias RR estimates following exposure to incident HSV-2 infection in either direction. Estimates were added in for the sub-pooling if available by sub-categories, but still ensuring only independent study estimates were included within a sub-category.

## F. Funnel plots

The funnel plots show the log (ln) study estimate and its corresponding standard error (SE), constructed using the “metafunnel” command in Stata(8). The centre line is the fixed-effects pooled estimate with pseudo 95%CI (i.e., summary effect  $\pm 1.96 * SE$ ). This gives the estimated area where 95% of study estimates are expected to fall in in the absence of statistical heterogeneity. The plots also show Egger's test of asymmetry(9). This is a linear regression line through the estimates which aids in the assessment of publication bias.

# FURTHER RESULTS

## G. Additional forest plots and meta-analyses

**Supplementary Figure S1.** Pooled crude cRR estimates of the association between HIV incidence and exposure to HSV-2 infection

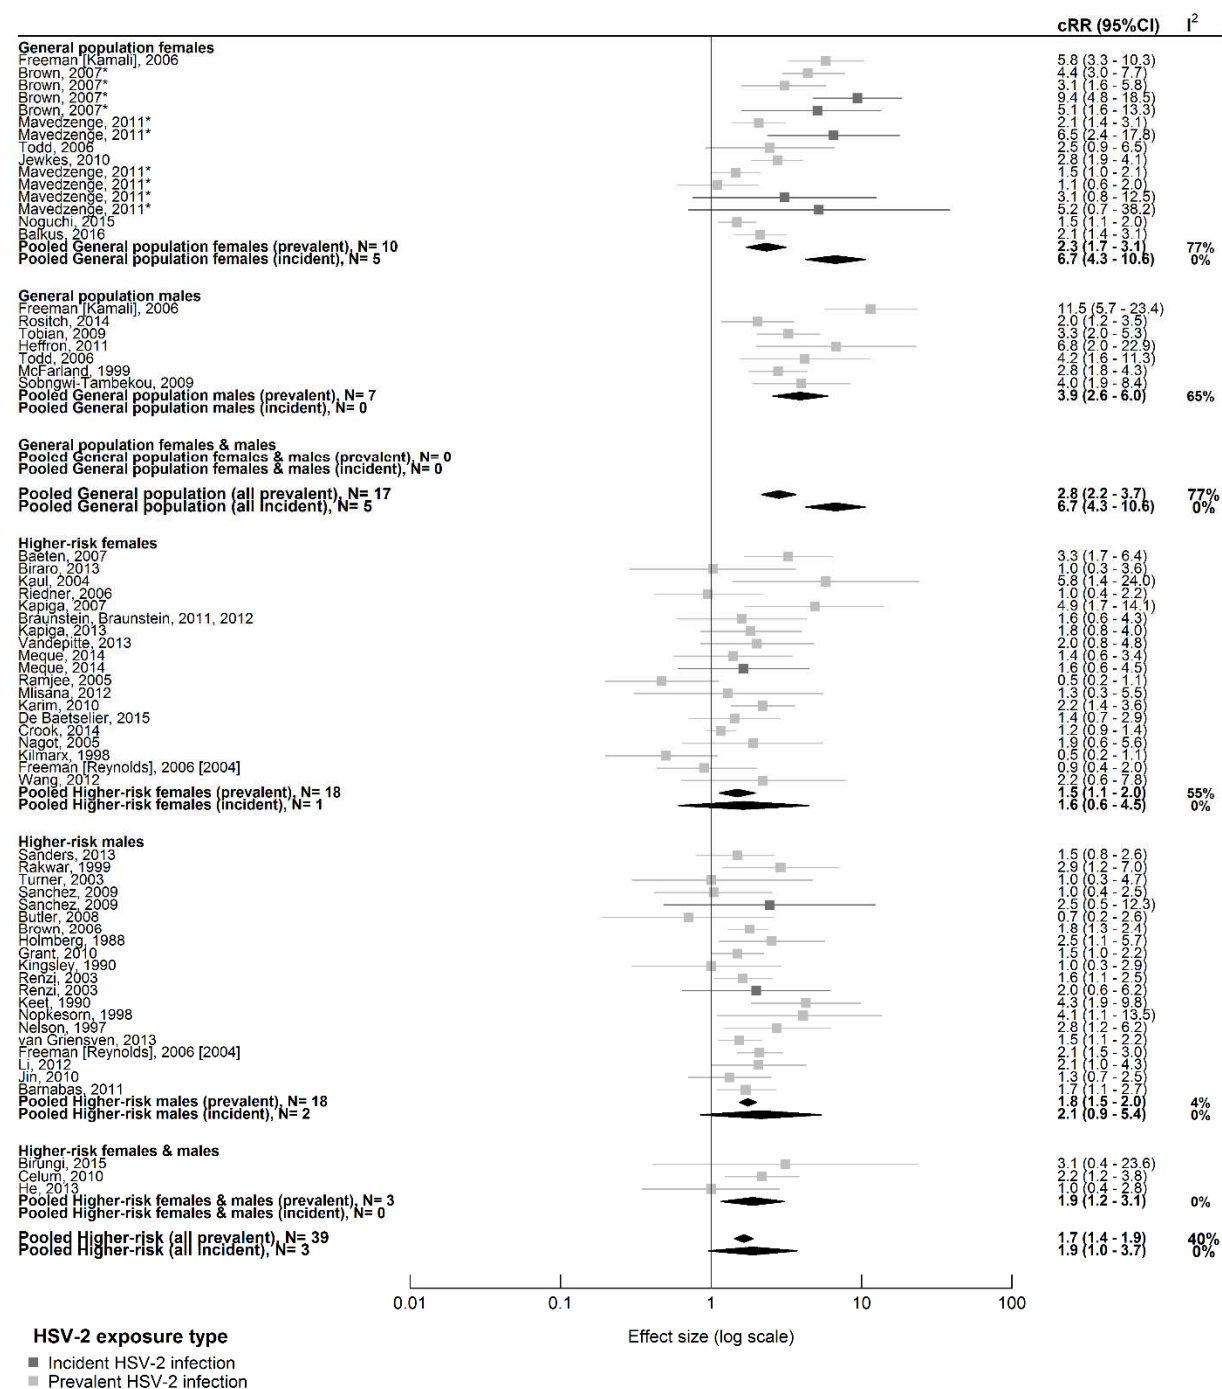

Footnote: Estimates for both prevalent HSV-2 infection on HIV acquisition, and incident HSV-2 infection on HIV acquisition (timing=1; i.e., HSV-2 seroconversion observed in previous time interval and thus *definitely before* HIV), are shown on this plot. Estimates are presented for females and males combined where these could not be obtained separately by sex. Multiple estimates for the same study corresponding to different study countries or areas are presented where these could not be combined or where it was not appropriate to do so (i.e., countries span two sub-regions) (\*); however all estimates are independent (i.e., for non-overlapping study populations) within each HSV-2 exposure category. Estimates are ordered by WHO region, UN Population Division African sub-region and then mid-point of study year.

## H. Funnel plots to assess publication bias

**Supplementary Figure S2a.** Funnel plot of the log crude cRR estimates of the association between HIV incidence and exposure to prevalent HSV-2 infection

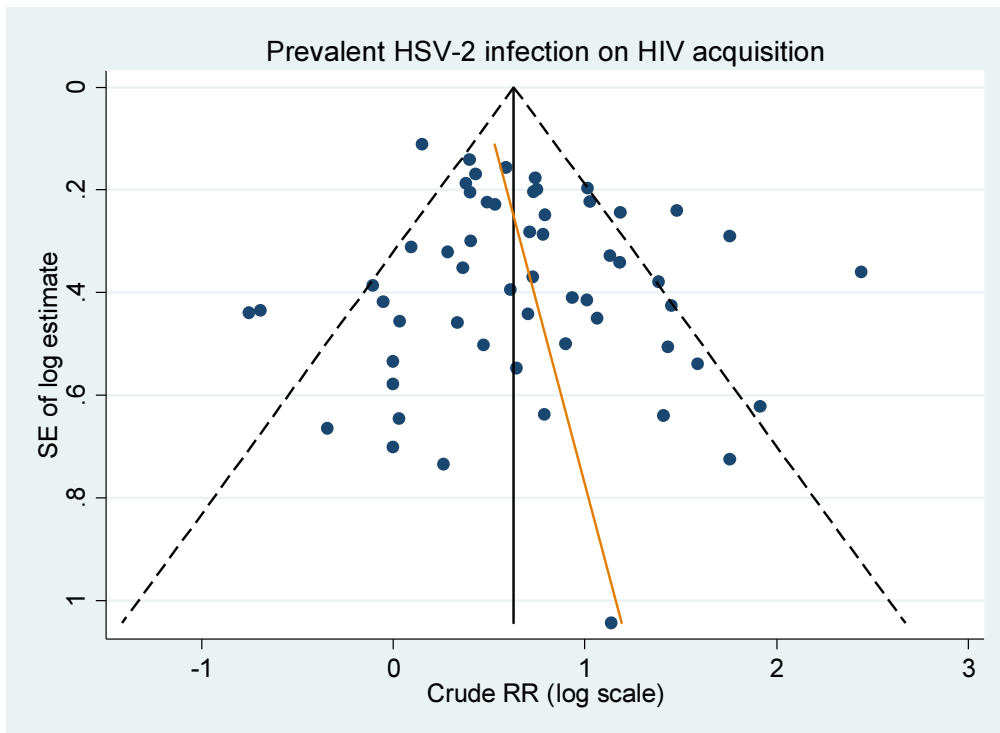

**Supplementary Figure S2b.** Funnel plot of the log adjusted aRR estimates of the association between HIV incidence and exposure to prevalent HSV-2 infection

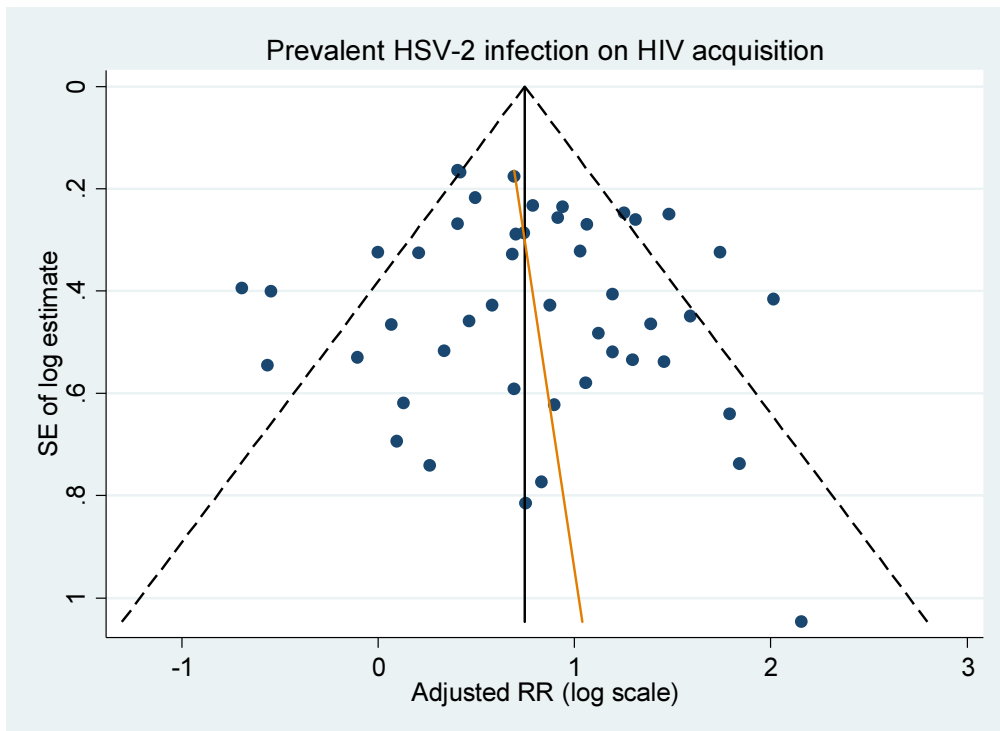



**Supplementary Figure S3a.** Funnel plot of the log crude cRR estimates of the association between HIV incidence and exposure to incident HSV-2 infection (timing=1)

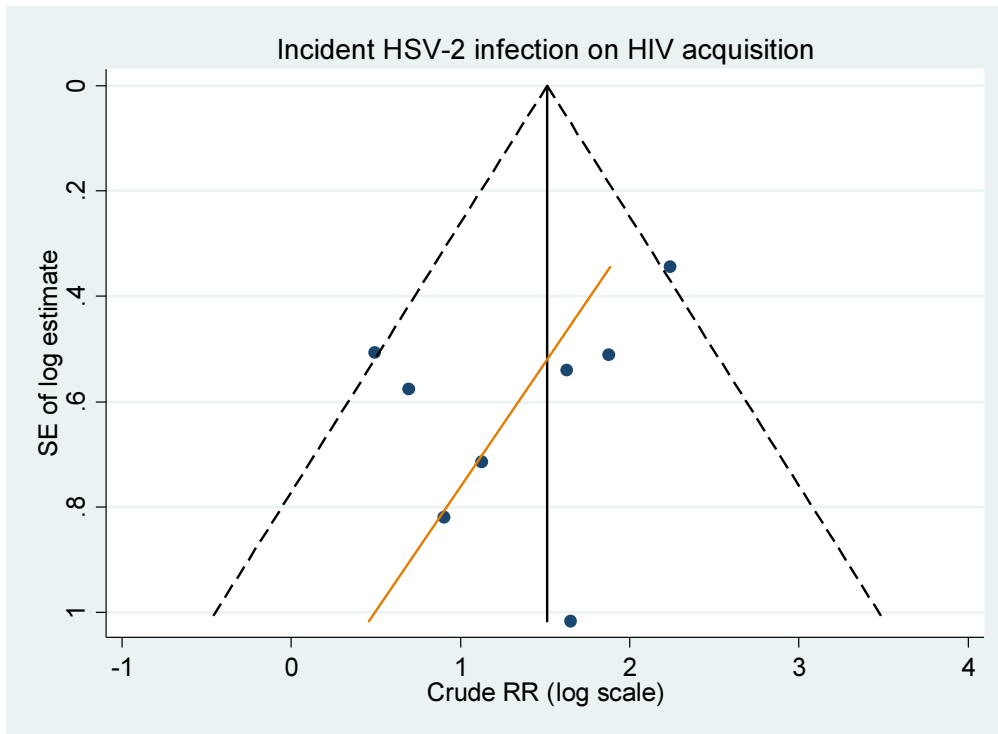

**Supplementary Figure S3b.** Funnel plot of the log adjusted aRR estimates of the association between HIV incidence and exposure to incident HSV-2 infection (timing=1)

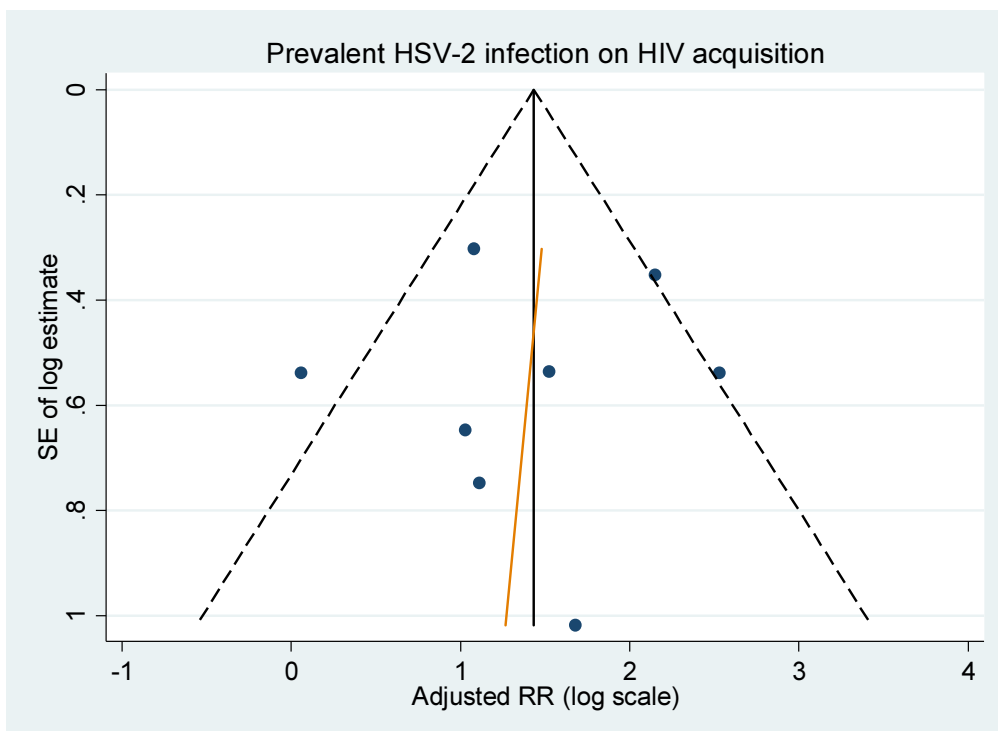

## I. Supplementary tables

**Table S1.** Description of studies and RR estimates of the association between HIV incidence and exposure to prevalent HSV-2 infection by participant and study characteristics, by estimate type

| Characteristic                                              | No. of studies (N <sub>s</sub> ) | No. of estimates (N <sub>e</sub> ) |           |           |           |           |           |
|-------------------------------------------------------------|----------------------------------|------------------------------------|-----------|-----------|-----------|-----------|-----------|
|                                                             |                                  | HR                                 |           | IRR       |           | OR        |           |
|                                                             |                                  | Crude                              | Adj       | Crude     | Adj       | Crude     | Adj       |
| <b>All</b>                                                  | <b>54</b>                        | <b>31</b>                          | <b>43</b> | <b>22</b> | <b>11</b> | <b>37</b> | <b>18</b> |
| <b>PARTICIPANT CHARACTERISTICS</b>                          |                                  |                                    |           |           |           |           |           |
| <b>Mean or median age<sup>1,8</sup></b>                     |                                  |                                    |           |           |           |           |           |
| ≤25 years                                                   | 15                               | 7                                  | 13        | 6         | 2         | 5         | 2         |
| >25 years                                                   | 39                               | 24                                 | 30        | 16        | 9         | 28        | 15        |
| Not reported                                                | 2                                | 0                                  | 0         | 0         | 0         | 4         | 1         |
| <b>Sex<sup>1</sup></b>                                      |                                  |                                    |           |           |           |           |           |
| All females <sup>1</sup>                                    | 28                               | 17                                 | 23        | 12        | 3         | 12        | 8         |
| • General population                                        | 11                               | 6                                  | 7         | 4         | 2         | 7         | 6         |
| • FSWs                                                      | 8                                | 7                                  | 13        | 2         | 0         | 0         | 0         |
| • Other higher-risk <sup>5</sup>                            | 10                               | 4                                  | 3         | 6         | 1         | 5         | 2         |
| All males                                                   | 28                               | 12                                 | 16        | 6         | 5         | 19        | 10        |
| • General population                                        | 10                               | 5                                  | 8         | 3         | 4         | 6         | 6         |
| • MSM                                                       | 13                               | 6                                  | 5         | 1         | 0         | 9         | 4         |
| • Other higher-risk <sup>6</sup>                            | 5                                | 1                                  | 3         | 2         | 1         | 4         | 0         |
| Females and males combined <sup>7</sup>                     | 8                                | 2                                  | 4         | 4         | 3         | 6         | 0         |
| <b>WHO region</b>                                           |                                  |                                    |           |           |           |           |           |
| Africa                                                      | 35                               | 22                                 | 32        | 18        | 10        | 24        | 14        |
| <i>Outside Africa</i>                                       |                                  |                                    |           |           |           |           |           |
| • Americas                                                  | 8                                | 1                                  | 1         | 0         | 0         | 10        | 4         |
| • Europe                                                    | 1                                | 0                                  | 0         | 0         | 0         | 1         | 0         |
| • Eastern Mediterranean                                     | 0                                | 0                                  | 0         | 0         | 0         | 0         | 0         |
| • Southeast Asia                                            | 5                                | 2                                  | 6         | 4         | 1         | 1         | 0         |
| • Western Pacific                                           | 4                                | 4                                  | 2         | 0         | 0         | 0         | 0         |
| • World (not including Africa)                              | 1                                | 2                                  | 2         | 0         | 0         | 1         | 0         |
| <b>HSV-2 prevalence<sup>1</sup></b>                         |                                  |                                    |           |           |           |           |           |
| ≤30%                                                        | 13                               | 8                                  | 9         | 3         | 2         | 3         | 1         |
| >30%                                                        | 42                               | 22                                 | 33        | 19        | 9         | 34        | 17        |
| Not reported                                                | 1                                | 1                                  | 1         | 0         | 0         | 0         | 0         |
| <b>STUDY CHARACTERISTICS</b>                                |                                  |                                    |           |           |           |           |           |
| <b>Study year (mid-point)<sup>1</sup></b>                   |                                  |                                    |           |           |           |           |           |
| Pre-2000                                                    | 16                               | 7                                  | 11        | 4         | 5         | 20        | 16        |
| 2000 onwards                                                | 33                               | 22                                 | 28        | 16        | 4         | 16        | 2         |
| Not reported                                                | 6                                | 2                                  | 4         | 2         | 2         | 1         | 0         |
| <b>Study design</b>                                         |                                  |                                    |           |           |           |           |           |
| Cohort                                                      | 27                               | 21                                 | 27        | 10        | 8         | 3         | 3         |
| Case-control <sup>9</sup>                                   | 7                                | 0                                  | 1         | 0         | 0         | 8         | 3         |
| Controlled trial                                            | 20                               | 10                                 | 15        | 12        | 3         | 26        | 12        |
| <i>Study design for analysis of controlled trial data</i>   |                                  |                                    |           |           |           |           |           |
| • Prospective                                               | 17                               | 10                                 | 15        | 12        | 3         | 11        | 0         |
| • Nested case-control <sup>9</sup>                          | 3                                | 0                                  | 0         | 0         | 0         | 15        | 12        |
| <i>Controlled trial intervention arm<sup>1</sup></i>        |                                  |                                    |           |           |           |           |           |
| • Intervention                                              | 6                                | 0                                  | 0         | 3         | 0         | 5         | 2         |
| • Control                                                   | 6                                | 1                                  | 1         | 3         | 0         | 4         | 2         |
| • Combined                                                  | 20                               | 9                                  | 14        | 6         | 3         | 17        | 8         |
| <b>Overall number of participants for study<sup>1</sup></b> |                                  |                                    |           |           |           |           |           |
| ≤1000                                                       | 31                               | 16                                 | 18        | 7         | 0         | 26        | 18        |
| >1000                                                       | 24                               | 15                                 | 25        | 15        | 11        | 11        | 0         |
| <b>Follow-up duration<sup>1</sup></b>                       |                                  |                                    |           |           |           |           |           |
| ≤1 year                                                     | 14                               | 9                                  | 13        | 6         | 2         | 7         | 0         |
| >1 year                                                     | 37                               | 22                                 | 29        | 15        | 6         | 27        | 17        |
| Not reported                                                | 4                                | 0                                  | 1         | 1         | 3         | 3         | 1         |

| Characteristic                                                                                                      | No. of studies<br>(N <sub>s</sub> ) | No. of estimates (N <sub>e</sub> ) |     |       |     |       |     |
|---------------------------------------------------------------------------------------------------------------------|-------------------------------------|------------------------------------|-----|-------|-----|-------|-----|
|                                                                                                                     |                                     | HR                                 |     | IRR   |     | OR    |     |
|                                                                                                                     |                                     | Crude                              | Adj | Crude | Adj | Crude | Adj |
| <b>Length of time between testing for HIV</b>                                                                       |                                     |                                    |     |       |     |       |     |
| ≤6 months                                                                                                           | 36                                  | 19                                 | 33  | 17    | 5   | 19    | 3   |
| >6 months                                                                                                           | 6                                   | 4                                  | 2   | 0     | 2   | 13    | 12  |
| Mixture of short and long intervals between testing                                                                 | 3                                   | 0                                  | 0   | 4     | 4   | 0     | 0   |
| Not reported                                                                                                        | 9                                   | 8                                  | 8   | 1     | 0   | 5     | 3   |
| <b>HSV-2 assay cut-off (only those studies with Focus HerpeSelect® as known assay)</b>                              |                                     |                                    |     |       |     |       |     |
| 1:1/manufacturer's recommendation/unknown                                                                           | 14                                  | 11                                 | 12  | 7     | 0   | 4     | 3   |
| >1:1                                                                                                                | 9                                   | 5                                  | 10  | 2     | 4   | 4     | 0   |
| <b>Definition of prevalent HSV-2 infection exposure<sup>1</sup></b>                                                 |                                     |                                    |     |       |     |       |     |
| Baseline                                                                                                            | 47                                  | 28                                 | 34  | 20    | 11  | 31    | 15  |
| Baseline and >60 days prior to HIV seroconversion                                                                   | 1                                   | 2                                  | 7   | 0     | 0   | 0     | 0   |
| Baseline or >2 years prior to HIV seroconversion                                                                    | 1                                   | 1                                  | 1   | 0     | 0   | 0     | 0   |
| Prior to, or at same visit as, HIV seroconversion                                                                   | 2                                   | 0                                  | 1   | 0     | 0   | 2     | 1   |
| Visit prior to HIV seroconversion                                                                                   | 1                                   | 0                                  | 0   | 2     | 0   | 1     | 0   |
| Same interval as HIV seroconversion                                                                                 | 1                                   | 0                                  | 0   | 0     | 0   | 1     | 0   |
| At visit 6 months prior to HIV seroconversion                                                                       | 1                                   | 0                                  | 0   | 0     | 0   | 1     | 1   |
| Anytime                                                                                                             | 1                                   | 0                                  | 0   | 0     | 0   | 1     | 1   |
| <b>Definition of unexposed group<sup>1</sup></b>                                                                    |                                     |                                    |     |       |     |       |     |
| HSV-2 negative at baseline                                                                                          | 28                                  | 15                                 | 17  | 7     | 2   | 18    | 5   |
| HSV-2 negative throughout follow-up                                                                                 | 21                                  | 10                                 | 19  | 12    | 9   | 17    | 12  |
| Not reported                                                                                                        | 6                                   | 6                                  | 7   | 3     | 0   | 2     | 1   |
| <b>Extraction of crude estimate<sup>1,4</sup></b>                                                                   |                                     |                                    |     |       |     |       |     |
| Reported                                                                                                            | 32                                  | 31                                 | N/A | 8     | N/A | 6     | N/A |
| Calculated from available data                                                                                      | 23                                  | 0                                  | N/A | 14    | N/A | 31    | N/A |
| <b>Adjusted for male circumcision status (males, or females and males combined only)<sup>1,2,3</sup></b>            |                                     |                                    |     |       |     |       |     |
| Yes                                                                                                                 | 9                                   | N/A                                | 11  | N/A   | 3   | N/A   | 0   |
| No                                                                                                                  | 15                                  | N/A                                | 7   | N/A   | 4   | N/A   | 10  |
| Unknown                                                                                                             | 3                                   | N/A                                | 2   | N/A   | 1   | N/A   | 0   |
| <b>Adjusted for condom use<sup>1,2,3</sup></b>                                                                      |                                     |                                    |     |       |     |       |     |
| Yes                                                                                                                 | 15                                  | N/A                                | 18  | N/A   | 4   | N/A   | 3   |
| No                                                                                                                  | 23                                  | N/A                                | 22  | N/A   | 6   | N/A   | 15  |
| Unknown                                                                                                             | 4                                   | N/A                                | 3   | N/A   | 1   | N/A   | 0   |
| <b>Adjusted for female hormonal contraception use (females, or females and males combined only)<sup>1,2,3</sup></b> |                                     |                                    |     |       |     |       |     |
| Yes                                                                                                                 | 6                                   | N/A                                | 12  | N/A   | 1   | N/A   | 0   |
| No                                                                                                                  | 16                                  | N/A                                | 14  | N/A   | 4   | N/A   | 8   |
| Unknown                                                                                                             | 2                                   | N/A                                | 1   | N/A   | 1   | N/A   | 0   |
| <b>Adjusted for any sexual behaviour (excl. condom use)<sup>1,2,3</sup></b>                                         |                                     |                                    |     |       |     |       |     |
| Yes                                                                                                                 | 29                                  | N/A                                | 34  | N/A   | 7   | N/A   | 7   |
| No                                                                                                                  | 8                                   | N/A                                | 7   | N/A   | 3   | N/A   | 11  |
| Unknown                                                                                                             | 3                                   | N/A                                | 2   | N/A   | 1   | N/A   | 0   |
| <b>Adjusted for GUD<sup>1,2,3</sup></b>                                                                             |                                     |                                    |     |       |     |       |     |
| Yes                                                                                                                 | 9                                   | N/A                                | 15  | N/A   | 2   | N/A   | 1   |
| No                                                                                                                  | 29                                  | N/A                                | 26  | N/A   | 8   | N/A   | 17  |
| Unknown                                                                                                             | 3                                   | N/A                                | 2   | N/A   | 1   | N/A   | 0   |
| <b>Adjusted for no. of sexual partners<sup>1,3</sup></b>                                                            |                                     |                                    |     |       |     |       |     |
| Yes                                                                                                                 | 20                                  | N/A                                | 22  | N/A   | 5   | N/A   | 6   |
| No                                                                                                                  | 16                                  | N/A                                | 14  | N/A   | 6   | N/A   | 12  |
| Unknown                                                                                                             | 5                                   | N/A                                | 7   | N/A   | 0   | N/A   | 0   |
| <b>Adjusted for age<sup>1,3</sup></b>                                                                               |                                     |                                    |     |       |     |       |     |
| Yes                                                                                                                 | 34                                  | N/A                                | 38  | N/A   | 9   | N/A   | 16  |
| No                                                                                                                  | 8                                   | N/A                                | 5   | N/A   | 2   | N/A   | 2   |
| Unknown                                                                                                             | 0                                   | N/A                                | 0   | N/A   | 0   | N/A   | 0   |

<sup>1</sup>Some overlapping studies; <sup>2</sup>Includes probable adjustment, and variable not included in multivariate model due to statistical non-significance; <sup>3</sup>Studies providing adjusted estimates; <sup>4</sup>Studies providing crude estimates; <sup>5</sup>Women with higher-risk sexual behaviour, women working in food and recreational facilities, STI clinic attendees, bar workers and women in an HIV serodiscordant partnership (grouped with FSW populations in Figures 2 and 3, Appendix Figure S1 and Table 2); <sup>6</sup>Men with higher-risk sexual behaviour (likely to be MSM), STI clinic attendees, male trucking company employees, clients of FSWs and Thai military conscripts (grouped with MSM in Figures 2 and 3, Appendix Figure S1 and Table 2); <sup>7</sup>Estimates by sex could not be obtained; <sup>8</sup>May be estimated from range; <sup>9</sup>All case-control studies

subsequently analysed together; FSWs – Female sex workers; MSM – Men who have sex with men; GUD – Genital ulcer disease; HR – Hazard ratio; IRR – Incidence rate ratio; OR – Odds ratio.

**Table S2.** Description of studies and RR estimates of the association between HIV incidence and exposure to incident HSV-2 infection by participant and study characteristics, by estimate type

| Characteristic                                                        | No. of studies (N <sub>s</sub> ) | No. of estimates (N <sub>e</sub> ) |           |          |          |           |           |
|-----------------------------------------------------------------------|----------------------------------|------------------------------------|-----------|----------|----------|-----------|-----------|
|                                                                       |                                  | HR                                 |           | IRR      |          | OR        |           |
|                                                                       |                                  | Crude                              | Adj       | Crude    | Adj      | Crude     | Adj       |
| <b>All</b>                                                            | <b>28</b>                        | <b>13</b>                          | <b>25</b> | <b>8</b> | <b>9</b> | <b>20</b> | <b>13</b> |
| <b>PARTICIPANT CHARACTERISTICS</b>                                    |                                  |                                    |           |          |          |           |           |
| <b>Mean or median age<sup>1,9</sup></b>                               |                                  |                                    |           |          |          |           |           |
| ≤25 years                                                             | 10                               | 4                                  | 7         | 2        | 2        | 3         | 3         |
| >25 years                                                             | 20                               | 9                                  | 18        | 6        | 7        | 16        | 10        |
| Not reported                                                          | 1                                | 0                                  | 0         | 0        | 0        | 1         | 0         |
| <b>Sex<sup>1</sup></b>                                                |                                  |                                    |           |          |          |           |           |
| All females                                                           | 11                               | 7                                  | 15        | 2        | 2        | 5         | 7         |
| • General population                                                  | 4                                | 5                                  | 5         | 0        | 1        | 5         | 7         |
| • FSWs                                                                | 2                                | 0                                  | 7         | 1        | 0        | 0         | 0         |
| • Other higher-risk <sup>6</sup>                                      | 5                                | 2                                  | 3         | 1        | 1        | 0         | 0         |
| All males                                                             | 17                               | 6                                  | 8         | 4        | 5        | 13        | 6         |
| • General population                                                  | 6                                | 2                                  | 3         | 3        | 5        | 6         | 5         |
| • MSM                                                                 | 9                                | 4                                  | 2         | 1        | 0        | 6         | 1         |
| • Other higher-risk <sup>7</sup>                                      | 3                                | 0                                  | 3         | 0        | 0        | 1         | 0         |
| Females and males combined <sup>8</sup>                               | 5                                | 0                                  | 2         | 2        | 2        | 2         | 0         |
| <b>WHO region</b>                                                     |                                  |                                    |           |          |          |           |           |
| Africa                                                                | 16                               | 9                                  | 18        | 6        | 8        | 12        | 12        |
| <i>Outside Africa</i>                                                 |                                  |                                    |           |          |          |           |           |
| Americas                                                              | 5                                | 2                                  | 2         | 0        | 0        | 5         | 1         |
| Europe                                                                | 1                                | 0                                  | 0         | 0        | 0        | 1         | 0         |
| Eastern Mediterranean                                                 | 0                                | 0                                  | 0         | 0        | 0        | 0         | 0         |
| Southeast Asia                                                        | 4                                | 1                                  | 5         | 2        | 1        | 1         | 0         |
| Western Pacific                                                       | 2                                | 1                                  | 0         | 0        | 0        | 1         | 0         |
| World (not including Africa)                                          | 0                                | 0                                  | 0         | 0        | 0        | 0         | 0         |
| <b>HSV-2 prevalence<sup>1</sup></b>                                   |                                  |                                    |           |          |          |           |           |
| ≤30%                                                                  | 8                                | 5                                  | 4         | 2        | 2        | 1         | 0         |
| >30%                                                                  | 21                               | 8                                  | 21        | 6        | 7        | 19        | 13        |
| Not reported                                                          | 0                                | 0                                  | 0         | 0        | 0        | 0         | 0         |
| <b>STUDY CHARACTERISTICS</b>                                          |                                  |                                    |           |          |          |           |           |
| <b>Study year (mid-point)<sup>1</sup></b>                             |                                  |                                    |           |          |          |           |           |
| Pre-2000                                                              | 11                               | 0                                  | 7         | 2        | 2        | 18        | 11        |
| 2000 onwards                                                          | 16                               | 13                                 | 16        | 5        | 7        | 1         | 2         |
| Not reported                                                          | 2                                | 0                                  | 2         | 1        | 0        | 1         | 0         |
| <b>Study design</b>                                                   |                                  |                                    |           |          |          |           |           |
| Cohort                                                                | 15                               | 7                                  | 17        | 4        | 4        | 3         | 0         |
| Case-control <sup>10</sup>                                            | 6                                | 0                                  | 1         | 0        | 0        | 7         | 1         |
| Controlled trial                                                      | 7                                | 6                                  | 7         | 4        | 5        | 10        | 12        |
| <i>Study design for analysis of controlled trial data<sup>1</sup></i> |                                  |                                    |           |          |          |           |           |
| • Prospective                                                         | 6                                | 6                                  | 7         | 4        | 5        | 0         | 0         |
| • Nested case-control <sup>10</sup>                                   | 2                                | 0                                  | 0         | 0        | 0        | 10        | 12        |
| <i>Controlled trial intervention arm</i>                              |                                  |                                    |           |          |          |           |           |
| • Intervention                                                        | 1                                | 0                                  | 0         | 0        | 0        | 2         | 2         |
| • Control                                                             | 1                                | 0                                  | 0         | 0        | 0        | 2         | 2         |
| • Combined                                                            | 7                                | 6                                  | 7         | 4        | 5        | 6         | 8         |
| <b>Overall number of participants for study<sup>1</sup></b>           |                                  |                                    |           |          |          |           |           |
| ≤1000                                                                 | 13                               | 3                                  | 4         | 2        | 0        | 18        | 11        |
| >1000                                                                 | 16                               | 10                                 | 21        | 6        | 9        | 2         | 2         |
| <b>Follow-up duration<sup>1</sup></b>                                 |                                  |                                    |           |          |          |           |           |
| ≤1 year                                                               | 7                                | 5                                  | 8         | 3        | 1        | 3         | 0         |
| >1 year                                                               | 18                               | 8                                  | 16        | 5        | 8        | 13        | 13        |
| Not reported                                                          | 4                                | 0                                  | 1         | 0        | 0        | 4         | 0         |
| <b>Length of time between testing for HIV</b>                         |                                  |                                    |           |          |          |           |           |
| ≤6 months                                                             | 17                               | 11                                 | 23        | 4        | 1        | 7         | 3         |

| Characteristic                                                                                                      | No. of studies<br>(N <sub>s</sub> ) | No. of estimates (N <sub>e</sub> ) |     |       |     |       |     |
|---------------------------------------------------------------------------------------------------------------------|-------------------------------------|------------------------------------|-----|-------|-----|-------|-----|
|                                                                                                                     |                                     | HR                                 |     | IRR   |     | OR    |     |
|                                                                                                                     |                                     | Crude                              | Adj | Crude | Adj | Crude | Adj |
| >6 months                                                                                                           | 4                                   | 1                                  | 0   | 0     | 2   | 11    | 10  |
| Mixture of short and long intervals between testing                                                                 | 2                                   | 0                                  | 0   | 3     | 5   | 0     | 0   |
| Not reported                                                                                                        | 5                                   | 1                                  | 2   | 1     | 1   | 2     | 0   |
| <b>HSV-2 assay cut-off (only those studies with Focus HerpeSelect® as known assay)</b>                              |                                     |                                    |     |       |     |       |     |
| 1:1/manufacture's recommendation/unknown                                                                            | 8                                   | 7                                  | 10  | 2     | 1   | 0     | 2   |
| >1:1                                                                                                                | 4                                   | 2                                  | 9   | 1     | 0   | 1     | 0   |
| <b>Definition of incident HSV-2 infection exposure<sup>1</sup></b>                                                  |                                     |                                    |     |       |     |       |     |
| ≤60 days prior to HIV seroconversion                                                                                | 1                                   | 0                                  | 1   | 0     | 0   | 0     | 0   |
| 60 days prior to HIV seroconversion                                                                                 | 1                                   | 0                                  | 5   | 0     | 0   | 0     | 0   |
| ≤6 months prior to HIV seroconversion                                                                               | 2                                   | 0                                  | 1   | 1     | 0   | 1     | 0   |
| >6 months prior to HIV seroconversion                                                                               | 1                                   | 0                                  | 1   | 1     | 0   | 0     | 0   |
| ≤2 years prior to HIV seroconversion                                                                                | 1                                   | 1                                  | 1   | 0     | 0   | 0     | 0   |
| Prior to, or at same visit as, HIV seroconversion                                                                   | 2                                   | 0                                  | 1   | 0     | 0   | 2     | 0   |
| Visit prior to HIV seroconversion                                                                                   | 1                                   | 1                                  | 1   | 0     | 0   | 0     | 0   |
| Same interval as HIV seroconversion                                                                                 | 1                                   | 0                                  | 0   | 0     | 0   | 1     | 0   |
| Anytime                                                                                                             | 21                                  | 11                                 | 14  | 6     | 7   | 16    | 13  |
| Not reported                                                                                                        | 1                                   | 0                                  | 0   | 0     | 2   | 0     | 0   |
| <b>Definition of unexposed group<sup>1</sup></b>                                                                    |                                     |                                    |     |       |     |       |     |
| HSV-2 negative at baseline                                                                                          | 0                                   | 0                                  | 0   | 0     | 0   | 0     | 0   |
| HSV-2 negative throughout follow-up                                                                                 | 28                                  | 10                                 | 22  | 8     | 9   | 20    | 13  |
| Not reported                                                                                                        | 1                                   | 3                                  | 3   | 0     | 0   | 0     | 0   |
| <b>Extraction of crude estimate<sup>1,4</sup></b>                                                                   |                                     |                                    |     |       |     |       |     |
| Reported                                                                                                            | 14                                  | 13                                 | N/A | 6     | N/A | 1     | N/A |
| Calculated from available data                                                                                      | 11                                  | 0                                  | N/A | 2     | N/A | 19    | N/A |
| <b>Adjusted for male circumcision status (males, or females and males combined only)<sup>1,2,3</sup></b>            |                                     |                                    |     |       |     |       |     |
| Yes                                                                                                                 | 5                                   | N/A                                | 2   | N/A   | 4   | N/A   | 0   |
| No                                                                                                                  | 9                                   | N/A                                | 8   | N/A   | 3   | N/A   | 6   |
| Unknown                                                                                                             | 0                                   | N/A                                | 0   | N/A   | 0   | N/A   | 0   |
| <b>Adjusted for condom use<sup>1,2,3</sup></b>                                                                      |                                     |                                    |     |       |     |       |     |
| Yes                                                                                                                 | 8                                   | N/A                                | 11  | N/A   | 6   | N/A   | 1   |
| No                                                                                                                  | 12                                  | N/A                                | 14  | N/A   | 3   | N/A   | 10  |
| Unknown                                                                                                             | 1                                   | N/A                                | 0   | N/A   | 0   | N/A   | 2   |
| <b>Adjusted for female hormonal contraception use (females, or females and males combined only)<sup>1,2,3</sup></b> |                                     |                                    |     |       |     |       |     |
| Yes                                                                                                                 | 4                                   | N/A                                | 9   | N/A   | 1   | N/A   | 0   |
| No                                                                                                                  | 8                                   | N/A                                | 8   | N/A   | 3   | N/A   | 5   |
| Unknown                                                                                                             | 1                                   | N/A                                | 0   | N/A   | 0   | N/A   | 2   |
| <b>Adjusted for any sexual behaviour (excl. condom use)<sup>1,2,3</sup></b>                                         |                                     |                                    |     |       |     |       |     |
| Yes                                                                                                                 | 16                                  | N/A                                | 23  | N/A   | 9   | N/A   | 1   |
| No                                                                                                                  | 3                                   | N/A                                | 2   | N/A   | 0   | N/A   | 10  |
| Unknown                                                                                                             | 1                                   | N/A                                | 0   | N/A   | 0   | N/A   | 2   |
| <b>Adjusted for GUD<sup>1,2,3</sup></b>                                                                             |                                     |                                    |     |       |     |       |     |
| Yes                                                                                                                 | 8                                   | N/A                                | 12  | N/A   | 4   | N/A   | 0   |
| No                                                                                                                  | 11                                  | N/A                                | 12  | N/A   | 5   | N/A   | 13  |
| Unknown                                                                                                             | 1                                   | N/A                                | 1   | N/A   | 0   | N/A   | 0   |
| <b>Adjusted for no. of sexual partners<sup>1,3</sup></b>                                                            |                                     |                                    |     |       |     |       |     |
| Yes                                                                                                                 | 11                                  | N/A                                | 16  | N/A   | 7   | N/A   | 1   |
| No                                                                                                                  | 8                                   | N/A                                | 7   | N/A   | 1   | N/A   | 10  |
| Unknown                                                                                                             | 3                                   | N/A                                | 2   | N/A   | 1   | N/A   | 2   |
| <b>Adjusted for age<sup>1,3</sup></b>                                                                               |                                     |                                    |     |       |     |       |     |
| Yes                                                                                                                 | 14                                  | N/A                                | 20  | N/A   | 8   | N/A   | 13  |
| No                                                                                                                  | 5                                   | N/A                                | 5   | N/A   | 0   | N/A   | 0   |
| Unknown                                                                                                             | 1                                   | N/A                                | 0   | N/A   | 1   | N/A   | 0   |
| <b>Timing of incident HSV-2 infection in relation to HIV acquisition<sup>1,5</sup></b>                              |                                     |                                    |     |       |     |       |     |
| 1 (Definitely before)                                                                                               | 7                                   | 6                                  | 10  | 0     | 1   | 2     | 3   |
| 2 (Indeterminably close)                                                                                            | 2                                   | 1                                  | 0   | 0     | 0   | 1     | 0   |
| 3 (Before & indeterminably close)                                                                                   | 12                                  | 4                                  | 10  | 3     | 1   | 5     | 0   |
| 4a (Maybe after & indeterminably close/before)                                                                      | 8                                   | 0                                  | 2   | 2     | 5   | 12    | 10  |

| Characteristic                           | No. of studies<br>(N <sub>s</sub> ) | No. of estimates (N <sub>e</sub> ) |     |       |     |       |     |
|------------------------------------------|-------------------------------------|------------------------------------|-----|-------|-----|-------|-----|
|                                          |                                     | HR                                 |     | IRR   |     | OR    |     |
|                                          |                                     | Crude                              | Adj | Crude | Adj | Crude | Adj |
| 4b (After & indeterminably close/before) | 5                                   | 2                                  | 3   | 3     | 2   | 0     | 0   |

<sup>1</sup>Some overlapping studies; <sup>2</sup>Includes probable adjustment, and variable not included in multivariate model due to statistical non-significance; <sup>3</sup>Studies providing adjusted estimates; <sup>4</sup>Studies providing crude estimates; <sup>5</sup>1=HSV-2 seroconversion observed in previous time interval and thus HSV-2 infection happened before HIV (definitely before); 2=HSV-2 seroconversion observed in same time interval as HIV and thus HSV-2 infection may have happened before or after HIV (indeterminably close); 3=HSV-2 seroconversion observed in previous or in same time interval as HIV (before & indeterminably close); 4a=some HSV-2 seroconversion may have occurred after HIV (maybe after & indeterminably close/before); 4b=some HSV-2 seroconversion observed after HIV (after & indeterminably close/before); <sup>6</sup>Women with higher-risk sexual behaviour, STI clinic attendees and bar workers (grouped with FSWs in Figures 2 and 3, Appendix Figure S1 and Table 2); <sup>7</sup>Men with higher-risk sexual behaviour (e.g. clients of FSWs), STI clinic attendees and Thai military conscripts (grouped with MSM in Figures 2 and 3, Appendix Figure S1 and Table 2); <sup>8</sup>Estimates by sex could not be obtained; <sup>9</sup>May be estimated from range; <sup>10</sup>All case-control studies subsequently analysed together; FSWs – Female sex workers; MSM – Men who have sex with men; GUD – Genital ulcer disease; HR – Hazard ratio; IRR – Incidence rate ratio; OR – Odds ratio.

**Supplementary Table S3.** Description of study characteristics relevant to the assessment of study quality for the association between HIV incidence and exposure to HSV-2 infection, and results of the Newcastle-Ottawa scale assessment

| Study no. | Multiple population author                                                     | Study type | Controlled trial intervention arm (controlled trials only) | Frequency of testing for HSV-2 and HIV infection | Length of fup (yrs) | Prevalent or incident HSV-2 infection exposure        | Definition of prevalent/incident HSV-2 infection exposure | Definition of HSV unexposed group | Other variable on which estimate varies, to distinguish it from other estimates in study | Crude estimate reported or could be calculated? | Crude estimate NR but could be calculated?? | Adjusted estimate reported? | Adjusted for male circumcision status (males, or females & males combined only)? | Adjusted for condom use? | Adjusted for female hormonal contraception use (females, or females & males combined only)? | Adjusted for (any) sexual behaviour? | Adjusted for genital ulcer disease? | Estimate shown in Figure 2 or Figure S1? | Selection 1) <sup>2</sup> | Selection 2) <sup>2</sup> | Selection 3) <sup>2</sup> | Selection 4) <sup>3</sup> | Comparability 1a) <sup>3</sup> | Comparability 1b) <sup>3</sup> | Outcome (cohorts)/Exposure (case-controls) 1) <sup>4</sup> | Outcome (cohorts)/Exposure (case-controls) 2) <sup>4</sup> | Outcome (cohorts)/Exposure (case-controls) 3) <sup>4</sup> |   |   |   |   |   |   |
|-----------|--------------------------------------------------------------------------------|------------|------------------------------------------------------------|--------------------------------------------------|---------------------|-------------------------------------------------------|-----------------------------------------------------------|-----------------------------------|------------------------------------------------------------------------------------------|-------------------------------------------------|---------------------------------------------|-----------------------------|----------------------------------------------------------------------------------|--------------------------|---------------------------------------------------------------------------------------------|--------------------------------------|-------------------------------------|------------------------------------------|---------------------------|---------------------------|---------------------------|---------------------------|--------------------------------|--------------------------------|------------------------------------------------------------|------------------------------------------------------------|------------------------------------------------------------|---|---|---|---|---|---|
| 1         | Masese (2015)(10), Baeten (2007)(11), McClelland (2015)(12), Graham (2013)(13) | CT         | NA                                                         | HSV-2 & HIV: B & mnthly                          | 3-11                | P                                                     | B & >60 days prior to HIV seroconversion <sup>1</sup>     | T                                 | -                                                                                        | NR                                              | NA                                          | Y                           | NA                                                                               | Y*                       | Y                                                                                           | Y                                    | Y                                   | Adjusted only                            | *                         | *                         | *                         | *                         | *                              | *                              | *                                                          | *                                                          | *                                                          | * |   |   |   |   |   |
|           |                                                                                |            |                                                            |                                                  |                     | I                                                     | 60 days prior to HIV seroconversion                       | T                                 | -                                                                                        | NR                                              | NA                                          | Y                           | NA                                                                               | Y*                       | Y                                                                                           | Y                                    | Y                                   | Adjusted only                            | *                         | *                         | *                         | *                         | *                              | *                              | *                                                          | *                                                          | *                                                          | * | * | * | * |   |   |
|           |                                                                                |            |                                                            |                                                  |                     | P                                                     | B & >60 days prior to HIV seroconversion <sup>1</sup>     | T                                 | Yr=1993-1997                                                                             | NR                                              | NA                                          | Y                           | NA                                                                               | Y*                       | Y                                                                                           | Y                                    | Y                                   | N                                        | *                         | *                         | *                         | *                         | *                              | *                              | *                                                          | *                                                          | *                                                          | * | * | * | * | * |   |
|           |                                                                                |            |                                                            |                                                  |                     | I                                                     | 60 days prior to HIV seroconversion                       | T                                 | Yr=1993-1997                                                                             | NR                                              | NA                                          | Y                           | NA                                                                               | Y*                       | Y                                                                                           | Y                                    | Y                                   | N                                        | *                         | *                         | *                         | *                         | *                              | *                              | *                                                          | *                                                          | *                                                          | * | * | * | * | * |   |
|           |                                                                                |            |                                                            |                                                  |                     | P                                                     | B & >60 days prior to HIV seroconversion <sup>1</sup>     | T                                 | Yr=1998-2002                                                                             | NR                                              | NA                                          | Y                           | NA                                                                               | Y*                       | Y                                                                                           | Y                                    | Y                                   | N                                        | *                         | *                         | *                         | *                         | *                              | *                              | *                                                          | *                                                          | *                                                          | * | * | * | * | * |   |
|           |                                                                                |            |                                                            |                                                  |                     | I                                                     | 60 days prior to HIV seroconversion                       | T                                 | Yr=1998-2002                                                                             | NR                                              | NA                                          | Y                           | NA                                                                               | Y*                       | Y                                                                                           | Y                                    | Y                                   | N                                        | *                         | *                         | *                         | *                         | *                              | *                              | *                                                          | *                                                          | *                                                          | * | * | * | * | * | * |
|           |                                                                                |            |                                                            |                                                  |                     | P                                                     | B & >60 days prior to HIV seroconversion <sup>1</sup>     | T                                 | Yr=2003-2007                                                                             | NR                                              | NA                                          | Y                           | NA                                                                               | Y*                       | Y                                                                                           | Y                                    | Y                                   | N                                        | *                         | *                         | *                         | *                         | *                              | *                              | *                                                          | *                                                          | *                                                          | * | * | * | * | * |   |
|           |                                                                                |            |                                                            |                                                  |                     | I                                                     | 60 days prior to HIV seroconversion                       | T                                 | Yr=2003-2007                                                                             | NR                                              | NA                                          | Y                           | NA                                                                               | Y*                       | Y                                                                                           | Y                                    | Y                                   | N                                        | *                         | *                         | *                         | *                         | *                              | *                              | *                                                          | *                                                          | *                                                          | * | * | * | * | * | * |
|           |                                                                                |            |                                                            |                                                  |                     | P                                                     | B & >60 days prior to HIV seroconversion <sup>1</sup>     | T                                 | Yr=2008-2012                                                                             | NR                                              | NA                                          | Y                           | NA                                                                               | Y*                       | Y                                                                                           | Y                                    | Y                                   | N                                        | *                         | *                         | *                         | *                         | *                              | *                              | *                                                          | *                                                          | *                                                          | * | * | * | * | * | * |
|           |                                                                                |            |                                                            |                                                  |                     | I                                                     | 60 days prior to HIV seroconversion                       | T                                 | Yr=2008-2012                                                                             | NR                                              | NA                                          | Y                           | NA                                                                               | Y*                       | Y                                                                                           | Y                                    | Y                                   | N                                        | *                         | *                         | *                         | *                         | *                              | *                              | *                                                          | *                                                          | *                                                          | * | * | * | * | * | * |
| 1-25      |                                                                                |            |                                                            |                                                  |                     | P                                                     | B & >60 days prior to HIV seroconversion <sup>1</sup>     | T                                 | HSV-2 assay cut-off=1.1                                                                  | Y                                               | N                                           | Y                           | NA                                                                               | Y                        | Y                                                                                           | Y                                    | Y                                   | Crude only                               | *                         | *                         | *                         | *                         | *                              | *                              | *                                                          | *                                                          | *                                                          |   |   |   |   |   |   |
|           |                                                                                |            |                                                            |                                                  |                     | I                                                     | <60 days prior to HIV seroconversion                      | T                                 | HSV-2 assay cut-off=1.1; timing=3                                                        | NR                                              | NA                                          | Y                           | NA                                                                               | Y                        | Y                                                                                           | Y                                    | Y                                   | N                                        | *                         | *                         | *                         | *                         | *                              | *                              | *                                                          | *                                                          | *                                                          | * | * | * | * |   |   |
| 1-42      |                                                                                |            |                                                            |                                                  | P                   | B & >60 days prior to HIV seroconversion <sup>1</sup> | T                                                         | -                                 | Y                                                                                        | N                                               | Y                                           | NA                          | Y                                                                                | Y                        | Y                                                                                           | Y                                    | N                                   | *                                        | *                         | *                         | *                         | *                         | *                              | *                              | *                                                          | *                                                          |                                                            |   |   |   |   |   |   |
| 2         | Barnabas (2011)(14)                                                            | RCT        | CM                                                         |                                                  | 1-05                | P                                                     | B                                                         | B                                 | -                                                                                        | Y                                               | N                                           | Y                           | Y                                                                                | N                        | NA                                                                                          | Y                                    | N                                   | Y                                        | *                         | *                         | -                         | *                         | *                              | -                              | *                                                          | *                                                          | *                                                          |   |   |   |   |   |   |



|   |                                                                                                                                                                           |     |    |                                                                                         |      |   |                                          |   |                             |    |    |                 |    |   |    |   |   |   |   |   |   |   |   |   |   |   |   |   |   |   |   |   |
|---|---------------------------------------------------------------------------------------------------------------------------------------------------------------------------|-----|----|-----------------------------------------------------------------------------------------|------|---|------------------------------------------|---|-----------------------------|----|----|-----------------|----|---|----|---|---|---|---|---|---|---|---|---|---|---|---|---|---|---|---|---|
|   |                                                                                                                                                                           |     | C  | HSV-2: B only (day 1 or wks 2 or 4); HIV: B, wk 12 & all subsequent visits except wk 26 |      | P | B                                        | B | -                           | Y  | N  | Y               | Y  | N | NA | Y | N | N | * | * | - | * | * | - | * | * | * |   |   |   |   |   |
|   |                                                                                                                                                                           |     | IV |                                                                                         |      | P | B                                        | B | -                           | Y  | Y  | NR              | -  | - | -  | - | - | N | * | * | - | * | - | - | * | * | * |   |   |   |   |   |
| 3 | Biraro (2013)(15),<br>Biraro (2013)(16)                                                                                                                                   | CT  | NA | HSV-2 & HIV: B & 12-mnthly                                                              | 4-20 | P | B                                        | T | General pop'n; F+M          | NR | NA | Y               | N  | N | N  | Y | N | N | * | * | * | * | * | * | * | * | * | - |   |   |   |   |
|   |                                                                                                                                                                           |     |    |                                                                                         |      | P | B                                        | T | General pop'n; F            | NR | NA | Y               | NA | N | N  | Y | N | Y | * | * | * | * | * | * | * | * | * | * | * | * | - |   |
|   |                                                                                                                                                                           |     |    |                                                                                         |      | P | B                                        | T | General pop'n; M            | NR | NA | NR              | -  | - | -  | - | - | N | * | * | * | * | - | - | * | * | - | - | * | * | - |   |
|   |                                                                                                                                                                           |     |    |                                                                                         |      | I | U                                        | T | General pop'n; F+M          | NR | NA | Y               | N  | N | N  | Y | N | N | * | * | * | * | * | * | * | * | * | * | * | * | - |   |
|   |                                                                                                                                                                           |     |    |                                                                                         |      | I | U                                        | T | General pop'n; F            | NR | NA | Y               | NA | N | N  | Y | N | N | * | * | * | * | * | * | * | * | * | * | * | * | - |   |
|   |                                                                                                                                                                           |     |    |                                                                                         |      | I | U                                        | T | General pop'n; M            | NR | NA | NR              | -  | - | -  | - | - | N | * | * | * | * | - | - | * | * | - | - | * | * | - |   |
|   |                                                                                                                                                                           |     |    |                                                                                         |      | P | B                                        | T | Serodiscordant couples; F+M | Y  | N  | Y               | N  | N | N  | Y | N | N | - | * | * | * | * | * | * | * | * | * | * | * | - |   |
|   |                                                                                                                                                                           |     |    |                                                                                         |      | P | B                                        | T | Serodiscordant couples; F   | Y  | N  | NR              | -  | - | -  | - | - | Y | - | * | * | * | * | - | - | * | * | - | - | * | * | - |
|   |                                                                                                                                                                           |     |    |                                                                                         |      | P | B                                        | T | Serodiscordant couples; M   | NR | NA | NR              | -  | - | -  | - | - | Y | - | * | * | * | * | - | - | * | * | - | - | * | * | - |
| 4 | Braunstein (2011)(17),<br>Braunstein (2012)(18)                                                                                                                           | CT  | NA | HSV-2: B & at 12 mnths; HIV: quarterly                                                  | 2-00 | P | B                                        | B | -                           | Y  | N  | Y               | NA | N | N  | N | N | Y | * | * | - | * | * | - | * | * | * |   |   |   |   |   |
| 5 | Brown (2006)(19)                                                                                                                                                          | RCT | CM | HSV-2 & HIV: 6-mnthly                                                                   | 3-01 | P | B or >2 yrs prior to HIV seroconversion  | T | -                           | Y  | N  | Y               | N  | N | NA | Y | N | Y | * | * | * | * | * | * | * | - | * | * |   |   |   |   |
|   |                                                                                                                                                                           |     |    |                                                                                         |      | I | Within 2 yrs prior to HIV seroconversion | T | -                           | Y  | N  | Y               | N  | N | NA | Y | N | N | * | * | * | * | * | * | * | - | * | * |   |   |   |   |
|   |                                                                                                                                                                           |     |    |                                                                                         |      | I | Last visit                               | T | -                           | Y  | N  | Y               | N  | N | NA | Y | N | N | * | * | * | * | * | * | * | - | * | * |   |   |   |   |
| 6 | Brown (2007)(20),<br>van de Wijert (2009)(21),<br>Morrison (2007)(22),<br>Van Der Pol (2008)(23),<br>Morrison (2010)(24),<br>Averbach(2010)(25),<br>Mavedzenge (2012)(26) | CT  | NA | HSV-2 & HIV: B & every 12 wks for 15-24 mnths                                           | 1-83 | P | B                                        | T | Zimbabwe                    | Y  | N  | Y               | NA | Y | Y  | Y | Y | Y | * | * | * | * | * | * | * | * | * |   |   |   |   |   |
|   |                                                                                                                                                                           |     |    |                                                                                         |      | I | A                                        | T | Zimbabwe                    | Y  | N  | Y               | NA | Y | Y  | Y | Y | * | * | * | * | * | * | * | * | * | * | * |   |   |   |   |
|   |                                                                                                                                                                           |     |    |                                                                                         |      | P | B                                        | T | Uganda                      | Y  | N  | Y               | NA | Y | Y  | Y | Y | Y | * | * | * | * | * | * | - | * | * | * |   |   |   |   |
|   |                                                                                                                                                                           |     |    |                                                                                         |      | I | A                                        | T | Uganda                      | Y  | N  | Y               | NA | Y | Y  | Y | Y | Y | * | * | * | * | * | * | - | * | * | * |   |   |   |   |
| 7 | Jewkes (2010)(27),<br>Jewkes (2008)(28),<br>Christofides (2014)(29)                                                                                                       | RCT | CM | HSV-2 & HIV: B & at 1 & 2 yrs                                                           | 1-90 | P | B                                        | B | -                           | Y  | Y  | NR              | -  | - | -  | - | - | Y | * | * | - | * | - | - | * | * | * |   |   |   |   |   |
|   |                                                                                                                                                                           |     |    |                                                                                         |      | I | A                                        | T | -                           | NS | NA | NS <sub>1</sub> | -  | - | -  | - | - | N | * | * | * | * | - | - | * | * | * |   |   |   |   |   |

|    |                                                                   |     |    |                                                                                                                                  |      |   |   |   |                         |    |    |    |    |                |    |   |                 |   |   |   |   |   |   |   |   |   |   |   |   |   |
|----|-------------------------------------------------------------------|-----|----|----------------------------------------------------------------------------------------------------------------------------------|------|---|---|---|-------------------------|----|----|----|----|----------------|----|---|-----------------|---|---|---|---|---|---|---|---|---|---|---|---|---|
| 8  | Gray (2011)(30),<br>Moodie (2015)(31)                             | RCT | CM | HSV-2: B; HIV: day of first vaccination, wks 12 & 30, & every 6 mnths thereafter, then at unmasking & subsequently every 3 mnths | 1-00 | P | B | B | F+M                     | NR | NA | SS | Y  | Y <sup>1</sup> | Y  | Y | N               | N | * | * | - | * | * | - | * | * | - |   |   |   |
|    |                                                                   |     |    |                                                                                                                                  |      | P | B | B | F                       | NR | NA | Y  | NA | Y <sup>1</sup> | Y  | Y | N               | Y | * | * | - | * | * | - | * | * | - | * | * | - |
|    |                                                                   |     |    |                                                                                                                                  |      | P | B | B | M                       | NR | NA | Y  | Y  | Y <sup>1</sup> | NA | Y | N               | Y | * | * | - | * | * | - | * | * | - | * | * | - |
| 9  | Guwatudde (2009)(32)                                              | CT  | NA | HSV-2 & HIV: B & 6-mnthly                                                                                                        | 1-00 | P | B | B | -                       | NR | NA | Y  | U  | U              | U  | U | U               | Y | * | * | - | * | * | - | * | - | * |   |   |   |
|    |                                                                   |     |    |                                                                                                                                  |      | I | A | U | -                       | NR | NA | NR | -  | -              | -  | - | -               | N | * | * | - | * | - | - | * | - | * | - | * |   |
| 10 | Celum (2010)(33),<br>Hughes (2012)(34),<br>Mackelprang (2012)(35) | RCT | CM | HSV-2: B; HIV: B & quarterly                                                                                                     | 2-00 | P | B | B | -                       | Y  | Y  | Y  | Y  | N              | N  | N | Y               | Y | - | * | * | - | * | - | - | * | * | - |   |   |
|    |                                                                   |     | IV |                                                                                                                                  |      | P | B | B | OR                      | Y  | Y  | NR | -  | -              | -  | - | N               | - | * | * | - | * | - | - | * | * | - |   |   |   |
|    |                                                                   |     | C  |                                                                                                                                  |      | P | B | B | OR                      | Y  | Y  | NR | -  | -              | -  | - | N               | - | * | * | - | * | - | - | * | * | - |   |   |   |
|    |                                                                   |     | IV |                                                                                                                                  |      | P | B | B | IRR                     | Y  | Y  | NR | -  | -              | -  | - | N               | - | * | * | - | * | - | - | * | * | - |   |   |   |
|    |                                                                   |     | C  |                                                                                                                                  |      | P | B | B | IRR                     | Y  | Y  | NR | -  | -              | -  | - | N               | - | * | * | - | * | - | - | * | * | - |   |   |   |
| 11 | Heffron (2011)(36)                                                | CT  | NA | HIV & HSV-2: B & fup                                                                                                             | 0-82 | P | B | B | -                       | Y  | N  | Y  | Y  | N              | NA | N | Y               | N | * | * | - | * | * | - | * | - | - |   |   |   |
|    |                                                                   |     |    |                                                                                                                                  |      | P | B | B | HSV-2 assay cut-off=3-3 | Y  | N  | Y  | Y  | N              | NA | N | Y               | N | * | * | - | * | * | - | * | - | - |   |   |   |
|    |                                                                   |     |    |                                                                                                                                  |      | P | B | T | -                       | Y  | N  | Y  | Y  | N              | NA | N | Y               | Y | * | * | * | * | * | - | * | - | - |   |   |   |
|    |                                                                   |     |    |                                                                                                                                  |      | I | A | T | -                       | Y  | N  | Y  | Y  | N              | NA | N | Y               | N | * | * | * | * | * | - | * | - | - |   |   |   |
| 12 | Kaul (2004)(37),<br>Hirbod (2008)(38),<br>Kaul (2007)(39)         | RCT | CM | HSV-2: B & 6-mnthly; HIV: B & quarterly                                                                                          | 2-14 | P | B | B | -                       | Y  | N  | Y  | NA | Y              | N  | Y | N               | Y | * | * | - | * | * | - | - | * | - |   |   |   |
| 13 | Jin (2010)(40)                                                    | CT  | NA | HSV-2: B & offered annually; HIV: B & annually                                                                                   | 3-90 | P | B | T | -                       | Y  | N  | NS | -  | -              | -  | - | Y               | * | * | * | * | - | - | * | * | * |   |   |   |   |
|    |                                                                   |     |    |                                                                                                                                  |      | I | A | T | -                       | Y  | N  | NS | -  | -              | -  | - | N               | * | * | * | * | - | - | * | * | * |   |   |   |   |
| 14 | Kapiga (2013)(41)                                                 | CT  | NA | HSV-2 & HIV: B & quarterly for 12 mnths                                                                                          | 0-87 | P | B | T | -                       | Y  | Y  | Y  | NA | Y*             | Y* | Y | Y* <sup>1</sup> | Y | * | * | * | * | * | * | * | - | * |   |   |   |
|    |                                                                   |     |    |                                                                                                                                  |      | I | A | T | -                       | Y  | Y  | Y  | NA | Y*             | Y* | Y | Y* <sup>1</sup> | N | * | * | * | * | * | * | * | * | - | * |   |   |
| 15 | Kapiga (2007)(42)                                                 | CT  | NA | HSV-2 & HIV: B & quarterly for 12 mnths                                                                                          | 1-04 | P | B | T | -                       | Y  | N  | Y  | NA | N              | N  | Y | Y               | Y | * | * | * | * | - | - | * | * | * |   |   |   |
|    |                                                                   |     |    |                                                                                                                                  |      | I | A | T | -                       | Y  | N  | Y  | NA | N              | N  | Y | Y               | N | * | * | * | * | - | - | * | * | * |   |   |   |
| 16 | Kebede (2004)(43),<br>Mekonnen (2005)(44)                         | CT  | NA | HSV-2 & HIV: B & 6-mnthly                                                                                                        | U    | P | B | T | F+M                     | Y  | Y  | Y  | N  | N              | N  | N | N               | N | * | * | * | * | - | - | * | - | * |   |   |   |
|    |                                                                   |     |    |                                                                                                                                  |      | P | B | T | F                       | NR | NA | Y  | NA | N              | N  | N | N               | Y | * | * | * | * | * | - | * | - | * |   |   |   |
|    |                                                                   |     |    |                                                                                                                                  |      | P | B | T | M                       | NR | NA | Y  | N  | N              | NA | N | N               | Y | * | * | * | * | * | - | * | - | * |   |   |   |
|    |                                                                   |     |    |                                                                                                                                  |      | I | A | T | -                       | Y  | Y  | -  | -  | -              | -  | - | -               | N | * | * | * | * | * | - | * | - | * |   |   |   |
| 17 | Kjetland (2006)(45)                                               | CT  | NA | HSV-2 & HIV: B & at 12 mnths                                                                                                     | 1-00 | P | B | B | -                       | NS | NA | NS | -  | -              | -  | - | N               | * | * | - | * | - | - | - | * | - |   |   |   |   |
| 18 | Li (2012)(46)                                                     | CT  | NA |                                                                                                                                  | 1-00 | P | B | U | -                       | Y  | N  | Y  | U  | U              | NA | U | N               | Y | * | * | - | * | * | * | * | * | * |   |   |   |

|     |                                                                                       |     |      |                                                                    |      |   |                                   |    |                            |    |    |                 |    |   |    |    |   |   |   |   |   |   |   |   |   |   |   |   |   |   |   |   |
|-----|---------------------------------------------------------------------------------------|-----|------|--------------------------------------------------------------------|------|---|-----------------------------------|----|----------------------------|----|----|-----------------|----|---|----|----|---|---|---|---|---|---|---|---|---|---|---|---|---|---|---|---|
|     |                                                                                       |     |      | HSV-2 & HIV: B, 6 mnths & 12 mnths                                 |      | I | A                                 | U  | -                          | NR | NA | NR              | -  | - | -  | -  | - | N | * | * | - | * | - | - | * | * | * |   |   |   |   |   |
| 19  | Mavedzenge (2011)(47), Venkatesh (2011)(48), Padian (2007)(49), Mavedzenge (2010)(50) | RCT | CM   | HSV-2 & HIV: B & quarterly                                         | 1-00 | P | B                                 | U  | Zimbabwe                   | Y  | N  | Y               | NA | N | N  | Y* | N | Y | * | * | - | * | * | - | * | * | * |   |   |   |   |   |
|     |                                                                                       |     |      |                                                                    |      | I | A                                 | U  | Zimbabwe                   | Y  | N  | Y               | NA | N | N  | Y* | N | Y | * | * | - | * | * | - | * | * | - | * | * | * |   |   |
|     |                                                                                       |     |      |                                                                    |      | P | B                                 | U  | Durban, South Africa       | Y  | N  | Y               | NA | Y | Y  | Y  | N | Y | * | * | - | * | * | * | * | * | * | * | * | * | * |   |
|     |                                                                                       |     |      |                                                                    |      | I | A                                 | U  | Durban, South Africa       | Y  | N  | Y               | NA | Y | Y  | Y  | N | Y | * | * | - | * | * | * | * | * | * | * | * | * | * | * |
|     |                                                                                       |     |      |                                                                    |      | P | B                                 | U  | Johannesburg, South Africa | Y  | N  | Y               | NA | N | N  | Y  | N | Y | * | * | - | * | - | - | * | * | * | * | * | * | * | * |
|     |                                                                                       |     |      |                                                                    |      | I | A                                 | U  | Johannesburg, South Africa | Y  | N  | Y               | NA | N | N  | Y  | N | Y | * | * | - | * | - | - | * | * | * | * | * | * | * | * |
|     | CC                                                                                    | CM  | 1-75 | I                                                                  | A    | T | 18-24 yrs                         | NR | NA                         | Y  | NA | U               | U  | U | N  | N  | * | * | * | * | * | * | - | * | * | * | * |   |   |   |   |   |
|     |                                                                                       |     |      | I                                                                  | A    | T | 25-49 yrs                         | NR | NA                         | Y  | NA | U               | U  | U | N  | N  | * | * | * | * | * | * | * | * | - | * | * | * | * |   |   |   |
| RCT | IV                                                                                    | C   | 1-75 | P                                                                  | B    | U | -                                 | Y  | Y                          | NR | -  | -               | -  | - | -  | N  | * | * | - | * | - | - | * | * | * | * |   |   |   |   |   |   |
|     |                                                                                       |     |      | P                                                                  | B    | U | -                                 | Y  | Y                          | NR | -  | -               | -  | - | -  | N  | * | * | - | * | - | - | * | * | * | * | * | * |   |   |   |   |
| 20  | Smith (2010)(51), Mehta (2012)(52), Rositch (2014)(53), Bailey (2007)(54)             | RCT | CM   | HSV-2: B, 6, 12, 18 & 24 mnths; HIV: B, 1, 3, 6, 12, 18 & 24 mnths | 3-50 | P | B                                 | B  | Smaller N                  | NR | NA | Y               | Y  | N | NA | N  | N | N | * | * | - | * | * | - | * | * | - |   |   |   |   |   |
|     |                                                                                       |     |      |                                                                    |      | P | B                                 | B  | Larger N                   | Y  | N  | Y               | Y  | Y | NA | Y  | N | Y | * | * | - | * | * | - | * | * | - | * | * | * |   |   |
|     |                                                                                       |     |      |                                                                    |      | I | A                                 | T  | -                          | Y  | N  | Y               | Y  | N | NA | N  | Y | N | * | * | * | * | * | - | - | * | * | * | * | * |   |   |
| 21  | Meque (2014)(55)                                                                      | CT  | NA   | HSV-2 & HIV: B & mnthly                                            | 1-00 | P | B                                 | B  | -                          | Y  | N  | NI              | -  | - | -  | -  | - | Y | - | * | - | * | - | - | * | * | * |   |   |   |   |   |
|     |                                                                                       |     |      |                                                                    |      | I | A                                 | T  | -                          | Y  | N  | NI <sup>1</sup> | -  | - | -  | -  | - | Y | - | * | * | * | * | - | - | * | * | * | * |   |   |   |
| 22  | Muiru (2013)(56)                                                                      | CT  | NA   | HSV-2 & HIV: B & quarterly                                         | 2-00 | P | B                                 | B  | -                          | NR | NA | NR              | -  | - | -  | -  | - | N | - | * | - | * | - | - | - | * | * |   |   |   |   |   |
|     |                                                                                       |     |      |                                                                    |      | I | A                                 | T  | -                          | NR | NA | NR              | -  | - | -  | -  | - | N | - | * | * | * | * | - | - | - | - | * | * | * |   |   |
| 23  | Nagot (2005)(57)                                                                      | CT  | NA   | HSV-2 & HIV: B & quarterly                                         | 1-95 | P | B                                 | B  | -                          | Y  | N  | Y               | NA | N | N  | Y  | N | Y | * | * | - | * | * | * | * | * | * |   |   |   |   |   |
|     |                                                                                       |     |      |                                                                    |      | I | A                                 | T  | -                          | NR | NA | NR              | -  | - | -  | -  | - | N | * | * | * | * | * | - | - | * | * | * | * |   |   |   |
| 24  | Karim (2010)(58), Naranbhai (2011)(59), Naranbhai (2012)(60)                          | RCT | IV   | HSV-2: unclear; HIV: B & mnthly                                    | 0-83 | P | Visit prior to HIV seroconversion | T  | -                          | Y  | Y  | SS              | -  | - | -  | -  | - | N | * | * | * | * | * | - | - | * | - |   |   |   |   |   |
|     |                                                                                       |     |      |                                                                    |      | P | Visit prior to HIV seroconversion | T  | -                          | Y  | Y  | SS              | -  | - | -  | -  | - | N | * | * | * | * | * | * | - | - | * | - | - |   |   |   |
|     |                                                                                       |     |      |                                                                    |      | P | Visit prior to HIV seroconversion | T  | -                          | Y  | Y  | SS              | -  | - | -  | -  | - | Y | * | * | * | * | * | * | - | - | * | - | - |   |   |   |
| 25  | Sanders (2013)(61), Okuku (2011)(62)                                                  | CT  | NA   | HSV-2 & HIV: B & mnthly (if reported RAI) or quarterly             | 1-40 | P | B                                 | U  | Higher-risk F              | NR | NA | NR              | -  | - | -  | -  | - | N | * | * | - | * | - | - | * | * | - |   |   |   |   |   |
|     |                                                                                       |     |      |                                                                    |      | I | A                                 | T  | Higher-risk F              | NR | NA | Y               | NA | Y | N  | Y  | N | N | * | * | * | * | * | * | - | - | * | * | - |   |   |   |
|     |                                                                                       |     |      |                                                                    |      | P | B                                 | T  | MSM                        | Y  | N  | NS <sub>1</sub> | -  | - | -  | -  | - | Y | * | * | * | * | * | * | - | - | * | * | - |   |   |   |
|     |                                                                                       |     |      |                                                                    |      | I | A                                 | T  | Higher-risk M              | NR | NA | Y               | N  | Y | NA | Y  | N | N | * | * | * | * | * | * | - | - | * | * | - |   |   |   |
|     |                                                                                       |     |      |                                                                    |      | I | A                                 | T  | MSM                        | Y  | N  | NS              | -  | - | -  | -  | - | N | * | * | * | * | * | * | - | - | * | * | - |   |   |   |

|    |                                                            |     |          |                                                            |      |   |                                      |    |                         |    |    |    |                |    |    |    |   |   |   |   |   |   |   |   |   |   |   |   |   |   |   |   |
|----|------------------------------------------------------------|-----|----------|------------------------------------------------------------|------|---|--------------------------------------|----|-------------------------|----|----|----|----------------|----|----|----|---|---|---|---|---|---|---|---|---|---|---|---|---|---|---|---|
| 26 | Ramjee (2005)(63)                                          | RCT | CM       | HSV-2 testing done retrospectively; HIV: B & fup           | 2-20 | P | B                                    | T  | -                       | Y  | Y  | Y  | NA             | N  | N  | Y  | N | Y | * | * | * | * | * | * | * | * | * | * |   |   |   |   |
|    |                                                            |     |          |                                                            |      | I | A                                    | T  | -                       | Y  | Y  | Y  | NA             | N  | N  | Y  | N | N | * | * | * | * | - | - | * | * | * | * | * | * | * | * |
| 27 | Renzi (2003)(64)                                           | CC  | NA       | HSV-2 & HIV: B & 6-mnthly                                  | 1-50 | P | B                                    | T  | -                       | Y  | Y  | NR | -              | -  | -  | -  | - | Y | * | * | * | * | - | - | * | * | * | * |   |   |   |   |
|    |                                                            |     |          |                                                            |      | P | A                                    | T  | -                       | Y  | N  | Y  | N              | Y  | NA | Y  | N | N | * | * | * | * | * | * | * | * | * | * | * | * | * | * |
|    |                                                            |     |          |                                                            |      | I | A                                    | T  | -                       | Y  | Y  | Y  | N              | Y  | NA | Y  | N | Y | * | * | * | * | * | * | * | * | * | * | * | * | * | * |
| 28 | Freeman (2006) (1)Reynolds (2003)(65), Reynolds (2004)(66) | CT  | NA       | HSV-2 & HIV: B & 3-mnthly: details from Mehendale 1995(67) | 0-89 | P | B                                    | T  | F+M                     | Y  | N  | Y  | Y              | Y  | N  | Y  | N | N | * | * | * | * | * | * | * | * | - | * |   |   |   |   |
|    |                                                            |     |          |                                                            |      | I | ≤6 mnths prior to HIV seroconversion | T  | F+M                     | Y  | N  | Y  | N              | N  | N  | Y  | N | N | * | * | * | * | * | * | * | * | * | * | - | * |   |   |
|    |                                                            |     |          |                                                            |      | I | >6 mnths prior to HIV seroconversion | T  | F+M                     | Y  | N  | Y  | N              | N  | N  | Y  | N | N | * | * | * | * | * | * | * | * | * | * | - | * |   |   |
|    |                                                            |     |          |                                                            |      | P | B                                    | T  | F                       | Y  | N  | Y  | NA             | N  | N  | Y  | N | Y | * | * | * | * | * | * | * | * | * | - | * |   |   |   |
|    |                                                            |     |          |                                                            |      | I | A <sup>1</sup>                       | T  | F                       | NR | NA | Y  | NA             | N  | N  | Y  | N | N | * | * | * | * | * | * | * | * | * | - | * |   |   |   |
|    |                                                            |     |          |                                                            |      | P | B                                    | T  | M                       | Y  | N  | Y  | N              | N  | NA | Y  | N | Y | * | * | * | * | * | * | * | * | * | - | * |   |   |   |
|    |                                                            |     |          |                                                            |      | I | A <sup>1</sup>                       | T  | M                       | NR | NA | Y  | N              | N  | NA | Y  | N | N | * | * | * | * | * | * | * | * | * | - | * |   |   |   |
| 29 | Riedner (2006)(68)                                         | CT  | NA       | HSV-2 & HIV: B & quarterly                                 | 2-25 | P | B                                    | B  | -                       | Y  | Y  | Y  | NA             | N  | N  | Y  | N | Y | * | * | - | * | - | - | * | * | - |   |   |   |   |   |
|    |                                                            |     |          |                                                            |      | P | B                                    | B  | Adj. for GUD            | Y  | Y  |    | NA             | N  | N  | Y  | Y | N | * | * | - | * | - | - | * | * | - |   |   |   |   |   |
|    |                                                            |     |          |                                                            |      | I | A                                    | T  | -                       | NR | NA | NR | -              | -  | -  | -  | - | N | * | * | * | * | - | - | * | * | - |   |   |   |   |   |
| 30 | Sanchez (2009)(69)                                         | CC  | NA       | HSV-2 & HIV: B & 6-mnthly                                  | 0-92 | P | B                                    | B  | -                       | Y  | Y  | NR | -              | -  | -  | -  | - | Y | * | * | * | * | * | - | - | * | - |   |   |   |   |   |
|    |                                                            |     |          |                                                            |      | I | A                                    | T  | Timing=3                | Y  | Y  | NR | -              | -  | -  | -  | - | N | * | * | * | * | * | * | - | * | - |   |   |   |   |   |
|    |                                                            |     |          |                                                            |      | I | A                                    | T  | Timing=1                | Y  | Y  | NR | -              | -  | -  | -  | - | Y | * | * | * | * | * | - | * | - |   |   |   |   |   |   |
| 31 | Sobngwi-Tambekou (2009)(70), Auvert (2010)(71)             | RCT | CM       | HSV-2 & HIV: B & at 3, 12 & 21 mnths                       | 1-75 | P | B                                    | T  | -                       | Y  | N  | Y  | Y              | Y  | NA | Y  | N | Y | * | * | * | * | * | - | - | * | * |   |   |   |   |   |
|    |                                                            |     |          |                                                            |      | I | A                                    | T  | -                       | Y  | N  | Y  | Y              | Y  | NA | Y  | N | N | * | * | * | * | * | - | - | * | * |   |   |   |   |   |
| 32 | Tobian (2009)(72), Gray (2009)(73), Tobian (2013)(74)      | RCT | CM       | HSV-2 & HIV: B & at 6, 12 & 24 mnths                       | 2-00 | P | B                                    | T  | -                       | Y  | N  | Y  | Y <sup>1</sup> | Y* | NA | Y* | N | Y | * | * | * | * | * | * | * | * | * | * |   |   |   |   |
|    |                                                            |     |          |                                                            |      | I | A                                    | T  | Timing=4b               | Y  | N  | Y  | Y <sup>1</sup> | Y* | NA | Y* | N | N | * | * | * | * | * | * | * | * | * | * | * | * |   |   |
|    |                                                            |     |          |                                                            |      | P | B                                    | T  | Adj. for GUD            | Y  | N  | Y  | Y <sup>1</sup> | Y* | NA | Y* | Y | N | * | * | * | * | * | * | * | * | * | * | * | * |   |   |
|    |                                                            |     |          |                                                            |      | I | A                                    | T  | Timing=4b; adj. for GUD | Y  | N  | Y  | Y <sup>1</sup> | Y* | NA | Y* | Y | N | * | * | * | * | * | * | * | * | * | * | * | * | * |   |
|    |                                                            |     |          |                                                            |      | I | A                                    | T  | Timing=3                | NR | NA | Y  | N <sup>1</sup> | Y* | NA | Y* | Y | N | * | * | * | * | * | * | * | * | * | * | * | * |   |   |
| I  | A                                                          | T   | Timing=1 | NR                                                         | NA   | Y | N <sup>1</sup>                       | Y* | NA                      | Y* | Y  | Y  | *              | *  | *  | *  | * | * | * | * | * | * | * | * |   |   |   |   |   |   |   |   |
| 33 | Todd (2006)(75), del Mar Pujades Rodriguez (2002)(76)      | CC  | CM       | HSV-2 & HIV: B & at 2 yrs                                  | 2-00 | P | B                                    | T  | F; 15-54 yrs            | Y  | Y  | Y  | NA             | N  | N  | N  | N | Y | * | * | * | * | * | - | * | * | - |   |   |   |   |   |
|    |                                                            |     |          |                                                            |      | I | A                                    | T  | F; 15-54 yrs            | Y  | Y  | Y  | NA             | N  | N  | N  | N | N | * | * | * | * | * | * | - | * | * | - |   |   |   |   |
|    |                                                            |     |          |                                                            |      | P | B                                    | T  | M; 15-54 yrs            | Y  | Y  | Y  | N              | N  | NA | N  | N | Y | * | * | * | * | * | * | - | * | * | - |   |   |   |   |
|    |                                                            |     |          |                                                            |      | I | A                                    | T  | M; 15-54 yrs            | Y  | Y  | Y  | N              | N  | NA | N  | N | N | * | * | * | * | * | * | - | * | * | - |   |   |   |   |

|    |                                                                |     |    |                                         |      |   |   |   |                         |    |    |    |    |   |    |   |   |   |   |   |   |   |   |   |   |   |   |   |   |   |
|----|----------------------------------------------------------------|-----|----|-----------------------------------------|------|---|---|---|-------------------------|----|----|----|----|---|----|---|---|---|---|---|---|---|---|---|---|---|---|---|---|---|
|    |                                                                |     |    |                                         |      | P | B | T | F; 15-24 yrs            | Y  | Y  | Y  | NA | N | N  | N | N | N | * | * | * | * | * | * | - | * | * | * | - |   |
|    |                                                                |     |    |                                         |      | I | A | T | F; 15-24 yrs            | Y  | Y  | Y  | NA | N | N  | N | N | N | * | * | * | * | * | * | - | * | * | * | - |   |
|    |                                                                |     |    |                                         |      | P | B | T | F; 25-54 yrs            | Y  | Y  | Y  | NA | N | N  | N | N | N | * | * | * | * | * | * | - | * | * | * | - |   |
|    |                                                                |     |    |                                         |      | I | A | T | F; 25-54 yrs            | Y  | Y  | Y  | NA | N | N  | N | N | N | * | * | * | * | * | * | - | * | * | * | - |   |
|    |                                                                |     |    |                                         |      | P | B | T | M; 15-24 yrs            | Y  | Y  | Y  | N  | N | NA | N | N | N | * | * | * | * | * | * | - | * | * | * | - |   |
|    |                                                                |     |    |                                         |      | I | A | T | M; 15-24 yrs            | Y  | Y  | Y  | N  | N | NA | N | N | N | * | * | * | * | * | * | - | * | * | * | - |   |
|    |                                                                |     |    |                                         |      | P | B | T | M; 25-54 yrs            | Y  | Y  | Y  | N  | N | NA | N | N | N | * | * | * | * | * | * | - | * | * | * | - |   |
|    |                                                                |     |    |                                         |      | I | A | T | M; 25-54 yrs            | Y  | Y  | Y  | N  | N | NA | N | N | N | * | * | * | * | * | * | - | * | * | * | - |   |
|    |                                                                |     | IV |                                         |      | P | B | T | F                       | Y  | Y  | Y  | NA | N | N  | N | N | N | * | * | * | * | * | * | - | * | * | * | - |   |
|    |                                                                |     |    |                                         |      | I | A | T | F                       | Y  | Y  | Y  | NA | N | N  | N | N | N | * | * | * | * | * | * | - | * | * | * | - |   |
|    |                                                                |     | C  |                                         |      | P | B | T | F                       | Y  | Y  | Y  | NA | N | N  | N | N | N | * | * | * | * | * | * | - | * | * | * | - |   |
|    |                                                                |     |    |                                         |      | I | A | T | F                       | Y  | Y  | Y  | NA | N | N  | N | N | N | * | * | * | * | * | * | - | * | * | * | - |   |
|    |                                                                |     | IV |                                         |      | P | B | T | M                       | Y  | Y  | Y  | N  | N | NA | N | N | N | * | * | * | * | * | * | - | * | * | * | - |   |
|    |                                                                |     |    |                                         |      | I | A | T | M                       | Y  | Y  | Y  | N  | N | NA | N | N | N | * | * | * | * | * | * | - | * | * | * | - |   |
|    |                                                                |     | C  |                                         |      | P | B | T | M                       | Y  | Y  | Y  | N  | N | NA | N | N | N | * | * | * | * | * | * | - | * | * | * | - |   |
|    |                                                                |     |    |                                         |      | I | A | T | M                       | Y  | Y  | Y  | N  | N | NA | N | N | N | * | * | * | * | * | * | - | * | * | * | - |   |
| 34 | Turner (2003)(77)                                              | CT  | NA | HSV-2 & HIV: B & repeat visits          | 2-50 | P | B | B | -                       | Y  | N  | Y  | N  | N | NA | Y | N | Y | * | * | * | * | * | * | - | * | * | * | - |   |
|    |                                                                |     |    |                                         |      | I | A | T | -                       | NR | NA | NR | -  | - | -  | - | - | N | * | * | * | * | * | * | - | - | - | - | * | * |
| 35 | Serwadda (2003)(78)                                            | CC  | CM | HSV-2: at 10 mnths; HIV: B & 10-mnthly  | 2-50 | P | B | B | F+M                     | Y  | N  | NR | -  | - | -  | - | - | N | * | * | * | * | * | * | - | - | - | - | * | * |
|    |                                                                |     |    |                                         |      | P | B | B | HSV-2 assay cut-off=3-5 | Y  | N  | NR | -  | - | -  | - | - | N | * | * | * | * | * | * | - | - | - | - | * | * |
|    |                                                                |     |    |                                         |      | P | B | B | F                       | NR | NA | Y  | NA | Y | N  | Y | N | Y | * | * | * | * | * | * | - | - | - | - | * | * |
|    |                                                                |     |    |                                         |      | P | B | B | M                       | NR | NA | Y  | N  | Y | NA | Y | N | Y | * | * | * | * | * | * | - | - | - | - | * | * |
| 36 | van Griensven (2013)(79), Lam (2017)(80), Thienkrua (2016)(81) | CT  | NA | HSV-2: B & 12-mnthly; HIV: B & 4-mnthly | 3-00 | P | B | B | -                       | Y  | N  | Y  | U  | U | NA | U | N | Y | * | * | * | * | * | * | - | - | - | - | * | * |
|    |                                                                |     |    |                                         |      | I | A | T | -                       | Y  | N  | NS | -  | - | -  | - | - | N | * | * | * | * | * | * | - | - | - | - | * | * |
| 37 | Noguchi (2015)(82)                                             | RCT | CM | HSV-2: B & study end; HIV: B & mnthly   | 1-11 | P | B | B | OR                      | Y  | Y  | NR | -  | - | -  | - | - | N | * | * | * | * | * | * | - | - | - | - | * | * |
|    |                                                                |     |    |                                         |      | P | B | B | IRR                     | Y  | Y  | NR | -  | - | -  | - | - | Y | * | * | * | * | * | * | - | - | - | - | * | * |
| 38 | Wang (2012)(83)                                                | CT  | NA | HSV-2 & HIV: B & fup                    | 1-55 | P | B | B | -                       | Y  | N  | NS | -  | - | -  | - | - | Y | * | * | * | * | * | * | - | - | - | - | * | * |
| 39 | McFarland (1999)(84)                                           | CT  | NA | HSV-2 & HIV: B & 6-mnthly               | 4-00 | P | B | T | -                       | Y  | Y  | Y  | N  | N | NA | Y | Y | Y | * | * | * | * | * | * | * | * | * | * | * | * |
|    |                                                                |     |    |                                         |      | I | A | T | Timing=3                | Y  | Y  | -  | -  | - | -  | - | - | N | * | * | * | * | * | * | * | * | * | * | * | * |
|    |                                                                |     |    |                                         |      | I | A | T | Timing=4b               | -  | NA | Y  | N  | N | NA | Y | Y | N | * | * | * | * | * | * | * | * | * | * | * | * |

|    |                                              |     |    |                                                                                       |      |   |                                                   |                                                   |   |    |    |    |                 |                 |                 |                |   |   |   |   |   |   |   |   |   |   |   |   |
|----|----------------------------------------------|-----|----|---------------------------------------------------------------------------------------|------|---|---------------------------------------------------|---------------------------------------------------|---|----|----|----|-----------------|-----------------|-----------------|----------------|---|---|---|---|---|---|---|---|---|---|---|---|
| 40 | Kilmarx (1998)(85)                           | CT  | NA | HSV-2 & HIV: B & 3-mnthly plus routine STD clinic attendances                         | 2-47 | P | B                                                 | B                                                 | - | Y  | N  | Y  | NA              | N               | N               | N              | N | Y | * | * | - | * | * | - | * | * | * |   |
| 41 | Rakwar (1999)(86)                            | CT  | NA | HSV-2: B only <sup>1</sup> ; HIV: B & 3-mnthly                                        | 1-67 | P | B                                                 | B                                                 | - | Y  | N  | Y  | Y               | Y               | NA              | Y              | N | Y | * | * | - | * | * | - | * | * | - |   |
| 42 | Kingsley (1990)(87)                          | CC  | NA | HSV-2 & HIV: B & fup (6 visits)                                                       | 2-00 | P | At visit 6 mnths prior to HIV seroconversion      | T                                                 | - | Y  | N  | Y  | N               | N               | NA              | N              | N | Y | * | * | * | * | * | * | * | * | * |   |
|    |                                              |     |    |                                                                                       |      |   | I                                                 | <6 mnths prior to HIV seroconversion              | T | -  | Y  | Y  | NR              | -               | -               | -              | - | - | N | * | * | * | * | - | * | * | * | * |
| 43 | Nopkesorn (1998)(88)                         | CT  | NA | HSV-2 & HIV: B & at 6, 17 & 23 mnths                                                  | 1-92 | P | B                                                 | B                                                 | - | Y  | N  | Y  | N               | N               | NA              | Y              | N | Y | - | * | * | - | * | - | - | * | * | * |
| 44 | Keet (1990)(89)                              | CC  | NA | HSV-2: B only but stored sera used; HIV: B & 3-mnthly                                 | U    | P | Same interval as HIV seroconversion               | T                                                 | - | Y  | Y  | NR | -               | -               | -               | -              | - | Y | * | * | * | * | - | - | * | * | * |   |
|    |                                              |     |    |                                                                                       |      |   | I                                                 | Same interval as HIV seroconversion               | T | -  | Y  | Y  | NR              | -               | -               | -              | - | - | N | * | * | * | * | - | - | * | * | * |
| 45 | Holmberg (1998)(90)                          | CC  | NA | U; HSV-2 samples drawn from before date of HIV seroconversion                         | U    | P | Prior to, or at same visit as, HIV seroconversion | U                                                 | - | Y  | Y  | Y  | N               | N               | NA              | Y              | N | Y | * | * | * | * | * | * | - | * | * |   |
|    |                                              |     |    |                                                                                       |      |   | I                                                 | Prior to, or at same visit as, HIV seroconversion | T | -  | Y  | Y  | NR              | -               | -               | -              | - | - | N | * | * | * | * | - | - | * | * | * |
| 46 | Nelson (1997)(91)                            | CC  | NA | HSV-2 & HIV: B & 6-mnthly                                                             | U    | P | Prior to HIV seroconversion                       | T                                                 | - | Y  | N  | Y  | N               | N               | NA              | Y              | U | Y | * | * | * | * | - | * | * | * | - |   |
|    |                                              |     |    |                                                                                       |      |   | I                                                 | Prior to, or at same visit as, HIV seroconversion | T | -  | Y  | N  | Y               | N               | N               | NA             | Y | U | N | * | * | * | * | - | * | * | * | - |
| 47 | Vandepitte (2013)(92), Vandepitte (2014)(93) | CT  | NA | HSV-2 & HIV: B, 3 mnths, 6 mnths, 9 mnths, 12 mnths then 6-mnthly                     | 2-10 | P | B <sup>1</sup>                                    | U                                                 | - | Y  | Y  | Y  | NA              | Y               | Y* <sup>1</sup> | Y              | N | Y | * | * | - | * | * | * | * | * | - |   |
| 48 | Balkus (2016)(94)                            | RCT | CM | HSV-2: B & study end; HIV: B & 3-mnthly                                               | 1-75 | P | B                                                 | B                                                 | - | Y  | Y  | NR | -               | -               | -               | -              | - | Y | * | * | - | * | - | - | * | * | - |   |
| 49 | Mlisana (2012)(95), Pellett Madan (2015)(96) | CT  | NA | HSV-2: B & mnthly; HIV: B & mnthly                                                    | 2-00 | P | B                                                 | B                                                 | - | Y  | N  | Y  | NA              | U               | U               | Y <sup>1</sup> | U | Y | * | * | - | * | * | - | - | * | * |   |
|    |                                              |     |    |                                                                                       |      |   | I                                                 | A                                                 | T | -  | NR | NA | NR              | -               | -               | -              | - | - | N | * | * | * | * | - | - | - | * | * |
| 50 | He (2013)(97), Ding (2015)(98)               | CT  | NA | HSV-2 & HIV: B & at 12 mnths                                                          | 1-00 | P | B                                                 | B                                                 | - | Y  | N  | Y  | N               | Y* <sup>1</sup> | N               | Y              | N | Y | - | * | * | - | * | * | - | * | * | - |
|    |                                              |     |    |                                                                                       |      |   | I                                                 | A                                                 | T | -  | Y  | Y  | NR              | -               | -               | -              | - | - | N | - | * | * | * | * | - | - | * | * |
| 51 | Hochberg (2015)(99)                          | CT  | NA | HSV-2 & HIV: B & fup (approx. 6 yrs later)                                            | 5-63 | I | A                                                 | T                                                 | - | NR | NA | Y  | Y* <sup>1</sup> | N               | N               | Y              | N | N | * | * | * | * | - | - | - | * | - |   |
| 52 | Grant (2010)(100)                            | RCT | CM | HSV-2: testing at B & every scheduled visit & screening every 24 wks; HIV: B & 4-wkly | 1-20 | P | B                                                 | B                                                 | - | Y  | Y  | NR | -               | -               | -               | -              | - | Y | * | * | - | * | - | - | * | * | * |   |
|    |                                              |     |    |                                                                                       |      |   | I                                                 | A                                                 | T | -  | Y  | Y  | NR              | -               | -               | -              | - | - | N | * | * | - | * | - | - | * | * | * |
|    |                                              |     |    |                                                                                       |      |   | C                                                 | B                                                 | B | -  | Y  | Y  | NR              | -               | -               | -              | - | - | N | * | * | - | * | - | - | * | * | * |
| 53 |                                              | RCT | CM |                                                                                       | 5-00 | P | B                                                 | U                                                 | F | Y  | N  | Y  | NA              | N               | N               | Y              | N | Y | * | * | - | * | * | * | * | * | - |   |

|    |                                                                                          |     |    |                                                                            |      |   |                |   |                          |    |    |    |   |   |    |   |   |   |   |   |   |   |   |   |   |   |   |   |   |
|----|------------------------------------------------------------------------------------------|-----|----|----------------------------------------------------------------------------|------|---|----------------|---|--------------------------|----|----|----|---|---|----|---|---|---|---|---|---|---|---|---|---|---|---|---|---|
|    | Freeman (2006) (1)[Kamali (unpublished; study information taken from Kamali (2003)(101)] |     |    | HSV-2 & HIV: B & subsequent study rounds 2 & 3                             |      | P | B              | U | M                        | Y  | N  | Y  | N | N | NA | Y | N | Y | * | * | - | * | * | * | * | * | * | - |   |
| 54 | De Baetselier (2015)(102)                                                                | CC  | CM | HSV-2 & HIV: B & at wks 4, 12, 24, 36, 52 & 56 & when clinically indicated | 1.00 | P | B              | B | -                        | Y  | Y  | NR | - | - | -  | - | - | Y | - | * | * | * | * | - | - | - | * | * |   |
|    |                                                                                          |     |    |                                                                            |      | P | B              | B | HSV-2 assay cut-off=0.66 | Y  | Y  | NR | - | - | -  | - | - | N | - | * | * | * | * | - | - | - | * | * | * |
|    |                                                                                          |     |    |                                                                            |      | P | B              | B | HSV-2 assay=Focus        | Y  | Y  | NR | - | - | -  | - | - | N | - | * | * | * | * | - | - | - | * | * | * |
| 55 | Butler (2008)(103)                                                                       | CC  | NA | HSV-2: B & fup <sup>1</sup> ; HIV: B & fup                                 | 0.50 | P | B <sup>1</sup> | U | -                        | Y  | Y  | NR | - | - | -  | - | - | Y | - | - | * | * | - | - | - | * | * |   |   |
| 56 | Crook (2014)(104), Daniels (2016)(105)                                                   | RCT | CM | HSV-2 testing in wks 0, 40, 52; HIV testing at B & in wks 12, 24, 40, 52   | 1.00 | P | B              | B | -                        | Y  | Y  | NR | - | - | -  | - | - | Y | - | * | * | - | * | - | - | * | * | * |   |
|    |                                                                                          |     |    |                                                                            |      | I | A              | T | -                        | NR | NA | NR | - | - | -  | - | - | N | - | * | * | * | * | - | - | * | * | * |   |
| 57 | Birungi (2015)(106)                                                                      | CT  | NA | HSV-2 & HIV: B & 6-monthly                                                 | 1.50 | P | B              | B | -                        | Y  | Y  | NR | - | - | -  | - | - | Y | - | * | * | - | * | - | - | * | * | * |   |
|    |                                                                                          |     |    |                                                                            |      | I | A              | B | -                        | NR | NA | NR | - | - | -  | - | - | N | - | * | * | * | * | - | - | * | * | * |   |

Fup=follow-up; NA=Not applicable; NR=Not reported; NI=not investigated because univariate findings not significant; CT=Cohort; CC=Case-control; RCT=Randomised controlled trial; IV=Intervention; C=Control; CM=Combined; P=Prevalent; I=Incident; B=Baseline; T=Throughout follow-up; A=Anytime during follow-up; U=Unclear or Unknown; OR=Odds ratio; IRR=Incidence rate ratio; MSM=Men who have sex with men; NS=Not statistically significant; SS=Statistically significant; Y\*=not included in final model but not SS in univariate model. Timing=1: HSV-2 seroconversion observed in previous time interval and thus HSV-2 infection happened before HIV (definitely before); Timing=2: HSV-2 seroconversion observed in same time interval as HIV and thus HSV-2 infection may have happened before or after HIV (indeterminably close); Timing=3: HSV-2 seroconversion observed in previous or in same time interval as HIV (before & indeterminably close); Timing=4a: some HSV-2 seroconversion may have occurred after HIV (maybe after & indeterminably close/before); Timing=4b: some HSV-2 seroconversion observed after HIV (after & indeterminably close/before). <sup>1</sup>Not certain; <sup>2</sup>For cohort studies and controlled trials: (1) Representativeness of exposed cohort; (2) Selection of unexposed cohort; (3) Ascertainment of exposure; (4) Demonstration that outcome did not occur before exposure. For case-control studies: (1) Adequacy of case definition; (2) Representativeness of cases; (3) Selection of controls; (4) Demonstration that outcome did not occur before exposure; <sup>3</sup>For cohort studies and controlled trials: (1) Comparability of exposed and unexposed. For case-control studies: (1) Comparability of cases and controls; <sup>4</sup>For cohort studies and controlled trials: (1) Assessment of outcome; (2) Length of follow-up; (3) Adequacy of follow-up. For case-control studies: (1) Assessment of exposure; (2) Same method of ascertainment for cases and controls; (3) Non-response rate. For detailed explanation of condition for awarding a star see Appendix C. Follow-up rate defined as the percentage with at least one follow-up visit for HIV among those eligible for enrolment in the study: the rate closest to this was used where information on study enrolment and retention was incomplete which means that the rate presented may be inaccurate. The follow-up rate for the overarching study was used for nested case-control studies.

## APPENDIX REFERENCES

1. Freeman EE, Weiss HA, Glynn JR, Cross PL, Whitworth JA, Hayes RJ. Herpes simplex virus 2 infection increases HIV acquisition in men and women: systematic review and meta-analysis of longitudinal studies. *AIDS*. 2006;20(1):73-83.
2. Looker KJ, Magaret AS, Turner KME, Vickerman P, Gottlieb SL, Newman LM. Global estimates of prevalent and incident herpes simplex virus type 2 infections in 2012. *PloS one*. 2015;1(10):e114989.
3. Morse SA. Etiology of genital ulcer disease and its relationship to HIV infection. *Sexually transmitted diseases*. 1999;26(1):63-5.
4. Van de Perre P, Segondy M, Foulongne V, Ouedraogo A, Konate I, Huraux JM, et al. Herpes simplex virus and HIV-1: deciphering viral synergy. *The Lancet infectious diseases*. 2008;8(8):490-7.
5. Wald A, Link K. Risk of human immunodeficiency virus infection in herpes simplex virus type 2-seropositive persons: a meta-analysis. *The Journal of infectious diseases*. 2002;185(1):45-52.
6. Higgins JP, Thompson SG. Quantifying heterogeneity in a meta-analysis. *Stat Med*. 2002;21(11):1539-58.
7. Higgins JP, Thompson SG, Deeks JJ, Altman DG. Measuring inconsistency in meta-analyses. *BMJ*. 2003;327(7414):557-60.
8. Sterne JAC, Harbord RM. Funnel plots in meta-analysis. *Stata J*. 2004;4(2):127-41.
9. Egger M, Davey Smith G, Schneider M. Bias in meta-analysis detected by a simple, graphical test. *BMJ*. 1997;315(7109):629-34.
10. Masese L, Baeten JM, Richardson BA, Bukusi E, John-Stewart G, Graham SM, et al. Changes in the contribution of genital tract infections to HIV acquisition among Kenyan high-risk women from 1993 to 2012. *AIDS (London, England)*. 2015;29(9):1077-85.
11. Baeten JM, Benki S, Chohan V, Lavreys L, McClelland RS, Mandaliya K, et al. Hormonal contraceptive use, herpes simplex virus infection, and risk of HIV-1 acquisition among Kenyan women. *AIDS (London, England)*. 2007;21(13):1771-7.
12. McClelland RS, Richardson BA, Cherutich P, Mandaliya K, John-Stewart G, Miregwa B, et al. A 15-year study of the impact of community antiretroviral therapy coverage on HIV incidence in Kenyan female sex workers. *AIDS*. 2015;29(17):2279-86.
13. Graham SM, Raboud J, McClelland RS, Jaoko W, Ndinya-Achola J, Mandaliya K, et al. Loss to follow-up as a competing risk in an observational study of HIV-1 incidence. *PloS one*. 2013;8(3):e59480.
14. Barnabas RV, Wasserheit JN, Huang Y, Janes H, Morrow R, Fuchs J, et al. Impact of herpes simplex virus type 2 on HIV-1 acquisition and progression in an HIV vaccine trial (the Step study). *Journal of acquired immune deficiency syndromes (1999)*. 2011;57(3):238-44.
15. Biraro S, Kamali A, White R, Karabarinde A, Nsiimire Ssendagala J, Grosskurth H, et al. Effect of HSV-2 on population-level trends in HIV incidence in Uganda between 1990 and 2007. *Tropical medicine & international health : TM & IH*. 2013;18(10):1257-66.
16. Biraro S, Ruzagira E, Kamali A, Whitworth J, Grosskurth H, Weiss HA. HIV-1 transmission within marriage in rural Uganda: a longitudinal study. *PloS one*. 2013;8(2):e55060.
17. Braunstein SL, Ingabire CM, Kestelyn E, Uwizera AU, Mwamarangwe L, Ntirushwa J, et al. High human immunodeficiency virus incidence in a cohort of Rwandan female sex workers. *Sexually transmitted diseases*. 2011;38(5):385-94.
18. Braunstein SL, van de Wijgert JH, Vyankandondera J, Kestelyn E, Ntirushwa J, Nash D. Risk Factor Detection as a Metric of STARHS Performance for HIV Incidence Surveillance Among Female Sex Workers in Kigali, Rwanda. *The open AIDS journal*. 2012;6:112-21.
19. Brown EL, Wald A, Hughes JP, Morrow RA, Krantz E, Mayer K, et al. High risk of human immunodeficiency virus in men who have sex with men with herpes simplex virus type 2 in the EXPLORE study. *American journal of epidemiology*. 2006;164(8):733-41.



20. Brown JM, Wald A, Hubbard A, Rungruengthanakit K, Chipato T, Rugpao S, et al. Incident and prevalent herpes simplex virus type 2 infection increases risk of HIV acquisition among women in Uganda and Zimbabwe. *AIDS*. 2007;21(12):1515-23.
21. van de Wijgert JH, Morrison CS, Brown J, Kwok C, Van Der Pol B, Chipato T, et al. Disentangling contributions of reproductive tract infections to HIV acquisition in African Women. *Sexually transmitted diseases*. 2009;36(6):357-64.
22. Morrison CS, Richardson BA, Mmiro F, Chipato T, Celentano DD, Luoto J, et al. Hormonal contraception and the risk of HIV acquisition. *AIDS (London, England)*. 2007;21(1):85-95.
23. Van Der Pol B, Kwok C, Pierre-Louis B, Rinaldi A, Salata RA, Chen PL, et al. *Trichomonas vaginalis* infection and human immunodeficiency virus acquisition in African women. *The Journal of infectious diseases*. 2008;197(4):548-54.
24. Morrison CS, Chen PL, Kwok C, Richardson BA, Chipato T, Mugerwa R, et al. Hormonal contraception and HIV acquisition: Reanalysis using marginal structural modeling. *AIDS (London, England)*. 2010;24(11):1778-81.
25. Averbach SH, Gravitt PE, Nowak RG, Celentano DD, Dunbar MS, Morrison CS, et al. The association between cervical human papillomavirus infection and HIV acquisition among women in Zimbabwe. *AIDS*. 2010;24(7):1035-42.
26. Mavedzenge SN, Van Der Pol B, Weiss HA, Kwok C, Mambo F, Chipato T, et al. The association between *Mycoplasma genitalium* and HIV-1 acquisition in African women. *AIDS*. 2012;26(5):617-24.
27. Jewkes RK, Dunkle K, Nduna M, Shai N. Intimate partner violence, relationship power inequity, and incidence of HIV infection in young women in South Africa: a cohort study. *Lancet (London, England)*. 2010;376(9734):41-8.
28. Jewkes R, Nduna M, Levin J, Jama N, Dunkle K, Puren A, et al. Impact of stepping stones on incidence of HIV and HSV-2 and sexual behaviour in rural South Africa: cluster randomised controlled trial. *BMJ (Clinical research ed)*. 2008;337:a506.
29. Christofides NJ, Jewkes RK, Dunkle KL, Nduna M, Shai NJ, Sterk C. Early adolescent pregnancy increases risk of incident HIV infection in the Eastern Cape, South Africa: a longitudinal study. *Journal of the International AIDS Society*. 2014;17:18585.
30. Gray GE, Allen M, Moodie Z, Churchyard G, Bekker LG, Nchabeleng M, et al. Safety and efficacy of the HVTN 503/Phambili study of a clade-B-based HIV-1 vaccine in South Africa: a double-blind, randomised, placebo-controlled test-of-concept phase 2b study. *The Lancet Infectious diseases*. 2011;11(7):507-15.
31. Moodie Z, Metch B, Bekker LG, Churchyard G, Nchabeleng M, Mlisana K, et al. Continued Follow-Up of Phambili Phase 2b Randomized HIV-1 Vaccine Trial Participants Supports Increased HIV-1 Acquisition among Vaccinated Men. *PloS one*. 2015;10(9):e0137666.
32. Guwatudde D, Wabwire-Mangen F, Eller LA, Eller M, McCutchan F, Kibuuka H, et al. Relatively low HIV infection rates in rural Uganda, but with high potential for a rise: a cohort study in Kayunga District, Uganda. *PloS one*. 2009;4(1):e4145.
33. Celum C, Wald A, Lingappa JR, Magaret AS, Wang RS, Mugo N, et al. Acyclovir and transmission of HIV-1 from persons infected with HIV-1 and HSV-2. *The New England journal of medicine*. 2010;362(5):427-39.
34. Hughes JP, Baeten JM, Lingappa JR, Magaret AS, Wald A, de Bruyn G, et al. Determinants of per-coital-act HIV-1 infectivity among African HIV-1-serodiscordant couples. *The Journal of infectious diseases*. 2012;205(3):358-65.
35. Mackelprang RD, Baeten JM, Donnell D, Celum C, Farquhar C, de Bruyn G, et al. Quantifying ongoing HIV-1 exposure in HIV-1-serodiscordant couples to identify individuals with potential host resistance to HIV-1. *The Journal of infectious diseases*. 2012;206(8):1299-308.
36. Heffron R, Chao A, Mwinga A, Sinyangwe S, Sinyama A, Ginwalla R, et al. High prevalent and incident HIV-1 and herpes simplex virus 2 infection among male migrant and non-migrant sugar farm workers in Zambia. *Sexually transmitted infections*. 2011;87(4):283-8.

37. Kaul R, Kimani J, Nagelkerke NJ, Fonck K, Ngugi EN, Keli F, et al. Monthly antibiotic chemoprophylaxis and incidence of sexually transmitted infections and HIV-1 infection in Kenyan sex workers: a randomized controlled trial. *Jama*. 2004;291(21):2555-62.
38. Hirbod T, Kaul R, Reichard C, Kimani J, Ngugi E, Bwayo JJ, et al. HIV-neutralizing immunoglobulin A and HIV-specific proliferation are independently associated with reduced HIV acquisition in Kenyan sex workers. *Aids*. 2008;22(6):727-35.
39. Kaul R, Nagelkerke NJ, Kimani J, Ngugi E, Bwayo JJ, Macdonald KS, et al. Prevalent herpes simplex virus type 2 infection is associated with altered vaginal flora and an increased susceptibility to multiple sexually transmitted infections. *The Journal of infectious diseases*. 2007;196(11):1692-7.
40. Jin F, Prestage GP, Imrie J, Kippax SC, Donovan B, Templeton DJ, et al. Anal sexually transmitted infections and risk of HIV infection in homosexual men. *Journal of acquired immune deficiency syndromes (1999)*. 2010;53(1):144-9.
41. Kapiga SH, Ewings FM, Ao T, Chilogani J, Mongi A, Baisley K, et al. The epidemiology of HIV and HSV-2 infections among women participating in microbicide and vaccine feasibility studies in Northern Tanzania. *PloS one*. 2013;8(7):e68825.
42. Kapiga SH, Sam NE, Bang H, Ni Q, Ao TT, Kiwelu I, et al. The role of herpes simplex virus type 2 and other genital infections in the acquisition of HIV-1 among high-risk women in northern Tanzania. *The Journal of infectious diseases*. 2007;195(9):1260-9.
43. Kebede Y, Dorigo-Zetsma W, Mengistu Y, Mekonnen Y, Schaap A, Wolday D, et al. Transmission of herpes simplex virus Type 2 among factory workers in Ethiopia. *The Journal of infectious diseases*. 2004;190(2):365-72.
44. Mekonnen Y, Sanders E, Messele T, Wolday D, Dorigo-Zestma W, Schaap A, et al. Prevalence and incidence of, and risk factors for, HIV-1 infection among factory workers in Ethiopia, 1997-2001. *Journal of health, population, and nutrition*. 2005;23(4):358-68.
45. Kjetland EF, Ndhlovu PD, Gomo E, Mduluzza T, Midzi N, Gwanzura L, et al. Association between genital schistosomiasis and HIV in rural Zimbabwean women. *AIDS (London, England)*. 2006;20(4):593-600.
46. Li D, Li S, Liu Y, Gao Y, Yu M, Yang X, et al. HIV incidence among men who have sex with men in Beijing: a prospective cohort study. *BMJ open*. 2012;2(6).
47. Mavedzenge SN, Weiss HA, Montgomery ET, Blanchard K, de Bruyn G, Ramjee G, et al. Determinants of differential HIV incidence among women in three southern African locations. *Journal of acquired immune deficiency syndromes (1999)*. 2011;58(1):89-99.
48. Venkatesh KK, van der Straten A, Cheng H, Montgomery ET, Lurie MN, Chipato T, et al. The relative contribution of viral and bacterial sexually transmitted infections on HIV acquisition in southern African women in the Methods for Improving Reproductive Health in Africa study. *International journal of STD & AIDS*. 2011;22(4):218-24.
49. Padian NS, van der Straten A, Ramjee G, Chipato T, de Bruyn G, Blanchard K, et al. Diaphragm and lubricant gel for prevention of HIV acquisition in southern African women: a randomised controlled trial. *Lancet*. 2007;370(9583):251-61.
50. Mavedzenge SN, Pol BV, Cheng H, Montgomery ET, Blanchard K, de Bruyn G, et al. Epidemiological synergy of *Trichomonas vaginalis* and HIV in Zimbabwean and South African women. *Sexually transmitted diseases*. 2010;37(7):460-6.
51. Smith JS, Moses S, Hudgens MG, Parker CB, Agot K, Maclean I, et al. Increased risk of HIV acquisition among Kenyan men with human papillomavirus infection. *The Journal of infectious diseases*. 2010;201(11):1677-85.
52. Mehta SD, Moses S, Parker CB, Agot K, Maclean I, Bailey RC. Circumcision status and incident herpes simplex virus type 2 infection, genital ulcer disease, and HIV infection. *AIDS (London, England)*. 2012;26(9):1141-9.
53. Rositch AF, Mao L, Hudgens MG, Moses S, Agot K, Backes DM, et al. Risk of HIV acquisition among circumcised and uncircumcised young men with penile human papillomavirus infection. *Aids*. 2014;28(5):745-52.

54. Bailey RC, Moses S, Parker CB, Agot K, Maclean I, Krieger JN, et al. Male circumcision for HIV prevention in young men in Kisumu, Kenya: a randomised controlled trial. *Lancet*. 2007;369(9562):643-56.
55. Meque I, Dube K, Feldblum PJ, Clements AC, Zango A, Cumbe F, et al. Prevalence, incidence and determinants of herpes simplex virus type 2 infection among HIV-seronegative women at high-risk of HIV infection: a prospective study in Beira, Mozambique. *PloS one*. 2014;9(2):e89705.
56. Muiru AN, Guthrie BL, Bosire R, Merkel M, Liu AY, Choi RY, et al. Incident HSV-2 infections are common among HIV-1-discordant couples. *The Journal of infectious diseases*. 2013;208(7):1093-101.
57. Nagot N, Ouedraogo A, Ouangre A, Cartoux M, Defer MC, Meda N, et al. Is sexually transmitted infection management among sex workers still able to mitigate the spread of HIV infection in West Africa? *Journal of acquired immune deficiency syndromes (1999)*. 2005;39(4):454-8.
58. Abdool Karim Q, Abdool Karim SS, Frohlich JA, Grobler AC, Baxter C, Mansoor LE, et al. Effectiveness and safety of tenofovir gel, an antiretroviral microbicide, for the prevention of HIV infection in women. *Science*. 2010;329(5996):1168-74.
59. Naranbhai V, Altfeld M, Abdool Karim Q, Ndung'u T, Abdool Karim SS, Carr WH. Natural killer cell function in women at high risk for HIV acquisition: insights from a microbicide trial. *AIDS (London, England)*. 2012;26(14):1745-53.
60. Naranbhai V, Abdool Karim SS, Altfeld M, Samsunder N, Durgiah R, Sibeko S, et al. Innate immune activation enhances hiv acquisition in women, diminishing the effectiveness of tenofovir microbicide gel. *The Journal of infectious diseases*. 2012;206(7):993-1001.
61. Sanders EJ, Okuku HS, Smith AD, Mwangome M, Wahome E, Fegan G, et al. High HIV-1 incidence, correlates of HIV-1 acquisition, and high viral loads following seroconversion among MSM. *AIDS*. 2013;27(3):437-46.
62. Okuku HS, Sanders EJ, Nyiro J, Ngetsa C, Ohuma E, McClelland RS, et al. Factors associated with herpes simplex virus type 2 incidence in a cohort of human immunodeficiency virus type 1-seronegative Kenyan men and women reporting high-risk sexual behavior. *Sexually transmitted diseases*. 2011;38(9):837-44.
63. Ramjee G, Williams B, Gouws E, Van Dyck E, De Deken B, Karim SA. The impact of incident and prevalent herpes simplex virus-2 infection on the incidence of HIV-1 infection among commercial sex workers in South Africa. *Journal of acquired immune deficiency syndromes (1999)*. 2005;39(3):333-9.
64. Renzi C, Douglas JM, Jr., Foster M, Critchlow CW, Ashley-Morrow R, Buchbinder SP, et al. Herpes simplex virus type 2 infection as a risk factor for human immunodeficiency virus acquisition in men who have sex with men. *The Journal of infectious diseases*. 2003;187(1):19-25.
65. Reynolds SJ, Risbud AR, Shepherd ME, Zenilman JM, Brookmeyer RS, Paranjape RS, et al. Recent herpes simplex virus type 2 infection and the risk of human immunodeficiency virus type 1 acquisition in India. *The Journal of infectious diseases*. 2003;187(10):1513-21.
66. Reynolds SJ, Shepherd ME, Risbud AR, Gangakhedkar RR, Brookmeyer RS, Divekar AD, et al. Male circumcision and risk of HIV-1 and other sexually transmitted infections in India. *Lancet (London, England)*. 2004;363(9414):1039-40.
67. Mehendale SM, Rodrigues JJ, Brookmeyer RS, Gangakhedkar RR, Divekar AD, Gokhale MR, et al. Incidence and predictors of human immunodeficiency virus type 1 seroconversion in patients attending sexually transmitted disease clinics in India. *The Journal of infectious diseases*. 1995;172(6):1486-91.
68. Riedner G, Hoffmann O, Rusizoka M, Mmbando D, Maboko L, Grosskurth H, et al. Decline in sexually transmitted infection prevalence and HIV incidence in female barworkers attending prevention and care services in Mbeya Region, Tanzania. *AIDS (London, England)*. 2006;20(4):609-15.
69. Sanchez J, Lama JR, Peinado J, Paredes A, Lucchetti A, Russell K, et al. High HIV and ulcerative sexually transmitted infection incidence estimates among men who have sex with men in Peru: awaiting for an effective preventive intervention. *Journal of acquired immune deficiency syndromes (1999)*. 2009;51 Suppl 1:S47-51.

70. Sobngwi-Tambekou J, Taljaard D, Lissouba P, Zarca K, Puren A, Lagarde E, et al. Effect of HSV-2 serostatus on acquisition of HIV by young men: results of a longitudinal study in Orange Farm, South Africa. *The Journal of infectious diseases*. 2009;199(7):958-64.
71. Auvert B, Lissouba P, Cutler E, Zarca K, Puren A, Taljaard D. Association of oncogenic and nononcogenic human papillomavirus with HIV incidence. *Journal of Acquired Immune Deficiency Syndromes*. 2010;53(1):111-6.
72. Tobian AA, Ssempijja V, Kigozi G, Oliver AE, Serwadda D, Makumbi F, et al. Incident HIV and herpes simplex virus type 2 infection among men in Rakai, Uganda. *AIDS (London, England)*. 2009;23(12):1589-94.
73. Gray RH, Serwadda D, Tobian AA, Chen MZ, Makumbi F, Suntuoke T, et al. Effects of genital ulcer disease and herpes simplex virus type 2 on the efficacy of male circumcision for HIV prevention: Analyses from the Rakai trials. *PLoS medicine*. 2009;6(11):e1000187.
74. Tobian AA, Grabowski MK, Kigozi G, Redd AD, Eaton KP, Serwadda D, et al. Human papillomavirus clearance among males is associated with HIV acquisition and increased dendritic cell density in the foreskin. *The Journal of infectious diseases*. 2013;207(11):1713-22.
75. Todd J, Grosskurth H, Chagalucha J, Obasi A, Mosha F, Balira R, et al. Risk factors influencing HIV infection incidence in a rural African population: a nested case-control study. *The Journal of infectious diseases*. 2006;193(3):458-66.
76. del Mar Pujades Rodríguez M, Obasi A, Mosha F, Todd J, Brown D, Chagalucha J, et al. Herpes simplex virus type 2 infection increases HIV incidence: a prospective study in rural Tanzania. *AIDS*. 2002;16(3):451-62.
77. Turner KR, McFarland W, Kellogg TA, Wong E, Page-Shafer K, Louie B, et al. Incidence and prevalence of herpes simplex virus type 2 infection in persons seeking repeat HIV counseling and testing. *Sexually transmitted diseases*. 2003;30(4):331-4.
78. Serwadda D, Gray RH, Sewankambo NK, Wabwire-Mangen F, Chen MZ, Quinn TC, et al. Human immunodeficiency virus acquisition associated with genital ulcer disease and herpes simplex virus type 2 infection: a nested case-control study in Rakai, Uganda. *The Journal of infectious diseases*. 2003;188(10):1492-7.
79. van Griensven F, Thienkrua W, McNicholl J, Wimonsate W, Chaikummao S, Chonwattana W, et al. Evidence of an explosive epidemic of HIV infection in a cohort of men who have sex with men in Thailand. *AIDS (London, England)*. 2013;27(5):825-32.
80. Lam CR, Holtz TH, Leelawiwat W, Mock PA, Chonwattana W, Wimonsate W, et al. Subtypes and Risk Behaviors Among Incident HIV Cases in the Bangkok Men Who Have Sex with Men Cohort Study, Thailand, 2006-2014. *AIDS research and human retroviruses*. 2017.
81. Thienkrua W, Todd CS, Chonwattana W, Wimonsate W, Chaikummao S, Varangrat A, et al. Incidence of and temporal relationships between HIV, herpes simplex II virus, and syphilis among men who have sex with men in Bangkok, Thailand: an observational cohort. *BMC infectious diseases*. 2016;16:340.
82. Noguchi LM, Richardson BA, Baeten JM, Hillier SL, Balkus JE, Chirenje ZM, et al. Risk of HIV-1 acquisition among women who use different types of injectable progestin contraception in South Africa: a prospective cohort study. *The lancet HIV*. 2015;2(7):e279-e87.
83. Wang H, Reilly KH, Brown K, Jin X, Xu J, Ding G, et al. HIV incidence and associated risk factors among female sex workers in a high HIV-prevalence area of China. *Sexually Transmitted Diseases*. 2012;39(11):835-41.
84. McFarland W, Gwanzura L, Bassett MT, Machezano R, Latif AS, Ley C, et al. Prevalence and incidence of herpes simplex virus type 2 infection among male Zimbabwean factory workers. *The Journal of infectious diseases*. 1999;180(5):1459-65.
85. Kilmarx PH, Limpakarnjanarat K, Mastro TD, Saisorn S, Kaewkungwal J, Korattana S, et al. HIV-1 seroconversion in a prospective study of female sex workers in northern Thailand: continued high incidence among brothel-based women. *AIDS*. 1998;12(14):1889-98.

86. Rakwar J, Lavreys L, Thompson ML, Jackson D, Bwayo J, Hassanali S, et al. Cofactors for the acquisition of HIV-1 among heterosexual men: prospective cohort study of trucking company workers in Kenya. *AIDS*. 1999;13(5):607-14.
87. Kingsley LA, Armstrong J, Rahman A, Ho M, Rinaldo CR, Jr. No association between herpes simplex virus type-2 seropositivity or anogenital lesions and HIV seroconversion among homosexual men. *J Acquir Immune Defic Syndr*. 1990;3(8):773-9.
88. Nopkesorn T, Mock PA, Mastro TD, Sangkharomya S, Sweat M, Limpakarnjanarat K, et al. HIV-1 subtype E incidence and sexually transmitted diseases in a cohort of military conscripts in northern Thailand. *J Acquir Immune Defic Syndr Hum Retrovirol*. 1998;18(4):372-9.
89. Keet IP, Lee FK, van Griensven GJ, Lange JM, Nahmias A, Coutinho RA. Herpes simplex virus type 2 and other genital ulcerative infections as a risk factor for HIV-1 acquisition. *Genitourin Med*. 1990;66(5):330-3.
90. Holmberg SD, Stewart JA, Gerber AR, Byers RH, Lee FK, O'Malley PM, et al. Prior herpes simplex virus type 2 infection as a risk factor for HIV infection. *JAMA : the journal of the American Medical Association*. 1988;259(7):1048-50.
91. Nelson KE, Eiumtrakul S, Celentano D, Maclean I, Ronald A, Suprasert S, et al. The association of herpes simplex virus type 2 (HSV-2), *Haemophilus ducreyi*, and syphilis with HIV infection in young men in northern Thailand. *J Acquir Immune Defic Syndr Hum Retrovirol*. 1997;16(4):293-300.
92. Vandepitte J, Weiss HA, Bukenya J, Nakubulwa S, Mayanja Y, Matovu G, et al. Alcohol use, mycoplasma genitalium, and other STIs associated With HIV incidence among women at high risk in Kampala, Uganda. *J Acquir Immune Defic Syndr*. 2013;62(1):119-26.
93. Vandepitte J, Weiss HA, Bukenya J, Kyakuwa N, Muller E, Buve A, et al. Association between Mycoplasma genitalium infection and HIV acquisition among female sex workers in Uganda: Evidence from a nested case-control study. *Sexually Transmitted Infections*. 2014;90(7):545-9.
94. Balkus JE, Brown ER, Hillier SL, Coletti A, Ramjee G, Mgodhi N, et al. Oral and injectable contraceptive use and HIV acquisition risk among women in four African countries: A secondary analysis of data from a microbicide trial. *Contraception*. 2016;93(1):25-31.
95. Mlisana K, Naicker N, Werner L, Roberts L, Van Loggerenberg F, Baxter C, et al. Symptomatic vaginal discharge is a poor predictor of sexually transmitted infections and genital tract inflammation in high-risk women in South Africa. *Journal of Infectious Diseases*. 2012;206(1):6-14.
96. Pellett Madan R, Masson L, Tugetman J, Werner L, Grobler A, Mlisana K, et al. Innate Antibacterial Activity in Female Genital Tract Secretions Is Associated with Increased Risk of HIV Acquisition. *AIDS Research and Human Retroviruses*. 2015;31(11):1153-9.
97. He N, Duan S, Ding Y, Rou K, McGoogan JM, Jia M, et al. Antiretroviral therapy reduces HIV transmission in discordant couples in rural Yunnan, China. *PloS one*. 2013;8(11):e77981.
98. Ding Y, Wu Z, Duan S, Rou K, Yang Y, Wang J, et al. Risk factors for incident HSV-2 infections among a prospective cohort of HIV-1-discordant couples in China. *Sexually transmitted infections*. 2015.
99. Hochberg CH, Schneider JA, Dandona R, Lakshmi V, Kumar GA, Sudha T, et al. Population and dyadic-based seroincidence of herpes simplex virus-2 and syphilis in southern India. *Sexually transmitted infections*. 2015;91(5):375-82.
100. Grant RM, Lama JR, Anderson PL, McMahan V, Liu AY, Vargas L, et al. Preexposure chemoprophylaxis for HIV prevention in men who have sex with men. *The New England journal of medicine*. 2010;363(27):2587-99.
101. Kamali A, Quigley M, Nakiyingi J, Kinsman J, Kengeya-Kayondo J, Gopal R, et al. Syndromic management of sexually-transmitted infections and behaviour change interventions on transmission of HIV-1 in rural Uganda: a community randomised trial. *Lancet*. 2003;361(9358):645-52.
102. De Baetselier I, Menten J, Cuylaerts V, Ahmed K, Deese J, Van Damme L, et al. Prevalence and incidence estimation of HSV-2 by two IgG ELISA methods among South African women at high risk of HIV. *PloS one*. 2015;10(3):e0120207.

103. Butler DM, Smith DM, Cachay ER, Hightower GK, Nugent CT, Richman DD, et al. Herpes simplex virus 2 serostatus and viral loads of HIV-1 in blood and semen as risk factors for HIV transmission among men who have sex with men. *AIDS (London, England)*. 2008;22(13):1667-71.
104. Crook AM, Ford D, Gafos M, Hayes R, Kamali A, Kapiga S, et al. Injectable and oral contraceptives and risk of HIV acquisition in women: an analysis of data from the MDP301 trial. *Hum Reprod*. 2014;29(8):1810-7.
105. Daniels B, Wand H, Ramjee G. Prevalence of Herpes Simplex Virus 2 (HSV-2) infection and associated risk factors in a cohort of HIV negative women in Durban, South Africa. *BMC research notes*. 2016;9(1):510.
106. Birungi J, Min JE, Muldoon KA, Kaleebu P, King R, Khanakwa S, et al. Lack of Effectiveness of Antiretroviral Therapy in Preventing HIV Infection in Serodiscordant Couples in Uganda: An Observational Study. *PloS one*. 2015;10(7):e0132182.
